1 **Simultaneous *in vivo* Pharmacokinetics and Pharmacodynamics of TDF Intravaginal**  
2 **Ring during High-dose Vaginal SHIV Challenge in Pigtail Macaques**

3

4 Katarina Kotnik Halavaty<sup>a,1</sup>, Adina K. Ott<sup>b,1, \*</sup>, Danijela Maric<sup>a</sup>, Jonathan T. Su<sup>b,\*\*</sup>, Edgar  
5 Matias<sup>a</sup>, Edward J. Allen<sup>a</sup>, Amy Martin<sup>c</sup>, Lara Pereira<sup>c</sup>, Frank Deyoung<sup>d</sup>, James M. Smith<sup>c</sup>,  
6 Patrick F. Kiser<sup>b</sup>, Thomas J. Hope<sup>a,#</sup>

7

8 <sup>a</sup> Cell and Developmental Biology Department, Feinberg School of Medicine,  
9 Northwestern University, Chicago, IL 60611.

10 <sup>b</sup> Department of Biomedical Engineering, Northwestern University, Evanston, IL 60208.

11 <sup>c</sup> Laboratory Branch, Division of HIV/AIDS Prevention, Centers for Disease Control and  
12 Prevention, Atlanta, GA 30333.

13 <sup>d</sup> Libra Management Group, Decatur, Georgia 30030

14 Authors' current affiliations:

15 \* Department of Chemistry, College of Lake County, Grayslake, IL 60030

16 \*\* Department of Physics and Engineering, Elon University, Elon, NC 27244.

17

18 <sup>1</sup>These authors equally contributed to this work.

19 #Address correspondence to Thomas J. Hope, [thope@northwestern.edu](mailto:thope@northwestern.edu)

20 Abstract: 239 words

21 Text: 4,807 words (excluding Materials and Methods, References, table footnotes and

22 figure legends)

## 23 **Abstract**

24           The demonstration of complete protection of macaques in a repeated low dose  
25 virus challenge by a tenofovir disoproxil fumarate (TDF) intravaginal ring (IVR) and the  
26 success of the dapivirine IVR in clinical trials highlighted the potential of IVRs as pre-  
27 exposure prophylaxis against HIV. Efficacy of TDF ring was not investigated in sexually  
28 active women. Our understanding of the mechanisms of protection is limited. To  
29 address this knowledge gap, we performed simultaneous pharmacokinetic and  
30 pharmacodynamic analysis of a TDF-IVR at the site of SIV challenge in pigtail macaques  
31 at the anatomical and cellular level. Specifically, we challenged TDF-IVR administered  
32 pigtail macaques with a single high dose of a non-replicative SIV-based vector containing  
33 a dual reporter system that helped us to identify the earliest targets of SIV infection  
34 within the mucosa. Two and three days after challenge, the macaques were euthanized  
35 and tenofovir (TFV) concentrations were measured in the female reproductive tract  
36 (FRT) by HPLC-MS/MS to correlate drug concentrations and SIV-vector transduction  
37 efficiency. TFV formed a gradient through the mucosal tissue, with the highest  
38 concentrations near the ring, in the upper vagina and endocervix. Despite this, several  
39 transduction events were identified with the most common sites being in the ovaries.  
40 Moreover, proviral DNA was detected in the cervix and vagina. Thus, our studies  
41 demonstrate an uneven distribution of TFV in the FRT of macaques after release from a  
42 TDF-IVR that leads to incomplete FRT protection from high viral dose challenge.

## 43 **Introduction**

44 Over the past decade, antiretroviral (ARV) HIV prevention strategies have  
45 undergone numerous clinical failures and some remarkable successes in the use of oral  
46 Truvada, oral Descovy (1-4) and injectable cabotegravir. Yet, most of what we know  
47 about ARV prevention of sexual transmission through the female reproductive tract  
48 (FRT) has been learned from clinical studies, where the main outcome is the correlation  
49 of local drug levels with reduced rates of infection among women (5-9). The CAPRISA-  
50 004 clinical trial results revealed that 1% tenofovir (TFV) gel applied vaginally before and  
51 after coitus reduced the risk of HIV acquisition among women in South Africa by 39%  
52 (5). Despite encouraging results, a subsequent VOICE study resulted in ineffective  
53 protection of coitus-independent daily use of this 1% TFV gel in female participants (6).  
54 Similarly, no evidence for efficacy in HIV prevention was found by researchers who  
55 conducted the FACTS 001 Phase III trial (9, 10). In a secondary analysis of the FACTS trial  
56 data, detection of TFV in vaginal fluids was significantly associated with a 52% reduction  
57 in HIV acquisition (9). Furthermore, a silicone-elastomer matrix IVR eluting the non-  
58 nucleoside reverse transcriptase inhibitor (NNRTI) dapivirine (DPV) has been tested in  
59 two separate clinical trials, ASPIRE (MTN-020) and Ring Study (IPM-027) in Sub-Saharan  
60 Africa. The outcome of the ASPIRE phase IIIb clinical trial demonstrated overall  
61 protection by 37% against HIV-1 acquisition (7), which was lower than initially expected.  
62 Further analyses revealed that the ring could reduce HIV risk between 56% (7) and 75%  
63 (11) depending on consistency of the ring usage. In open-labeled settings a 39%

64 reduction in HIV-1 infections among populations with high background of HIV-1  
65 incidence was observed (12).

66 In this study we utilized a non-human primate model that enabled us to study a  
67 mechanism of protection by TDF-IVR in a controlled and sustained release manner  
68 locally. We previously showed that a 28 day TDF-IVR can prevent systemic SHIV infection  
69 in pigtailed macaques (PTM) after multiple low-dose vaginal challenges (13, 14).  
70 However, the mechanism of this protection remained unexplained. The efficacy of the  
71 TDF-IVR in preventing systemic infection could either be due to high local FRT drug  
72 concentrations blocking infection from low-dose challenge all together (sterilizing  
73 protection) or lowering the frequency of early infection events and containing viral  
74 spread in a way that impedes systemic infection and viremia. Waiting several days for  
75 the basic read out of systemic infection does not allow for the exploration of important  
76 mechanistic details on the biology and pharmacology of the prevention strategy under  
77 examination. In contrast, simultaneously investigating the viral and pharmaco-dynamics  
78 and pharmacokinetics of virus-drug interaction during the first few hours post-challenge  
79 leads to a better understanding of the mechanisms through which prevention strategies  
80 may interfere with viral dissemination in the complex environment of the FRT. The two  
81 main points to be addressed to understand these mechanisms are the biodistribution of  
82 drug in the mucosal site of challenge and the sufficiency of local drug concentrations to  
83 prevent all infection throughout the entire FRT in a high-dose challenge model.

84 A Phase 1 clinical study showed that TDF-IVR was safe, well accepted and well  
85 tolerated with protective TDF levels in sexually abstinent women over 14 days of

86 continuous ring use (15). However, the following Phase 1b study was terminated early  
87 due to the development of genital ulcers near the ring and high levels of multiple  
88 inflammatory cytokines and chemokines in sexually active women administered with  
89 TDF-IVR over 90 days (16). These data raise new toxicological questions concerning drug  
90 concentrations generated in the FRT with the TDF-IVR.

91 We have previously developed a replication defective pseudoviral dual reporter  
92 system (LICH) that allows the identification of potential foci of transduction 48 hours  
93 after exposure in the FRT (17). These foci can be further analyzed by characterizing  
94 transduced cells based on mCherry and luciferase genes expression using  
95 immunohistochemical staining. This study revealed that the entire upper and lower FRT  
96 could be exposed to the vaginal challenge inoculum and contain susceptible target cells.  
97 It was not clear before this study that the upper FRT of rhesus macaques, and  
98 particularly the ovaries were susceptible to viral transductions following vaginal  
99 challenge with a single high-dose of this pseudoviral LICH reporter (17). These  
100 observations raised questions whether an IVR would provide enough antiretroviral drug  
101 to the entire FRT to protect the upper FRT including ovaries.

102 In the current study, we employed this LICH reporter system to identify the  
103 locations within the FRT of early SHIV transduction in PTM protected by TDF-IVR  
104 treatment. In parallel, at necropsy, 3 days after challenge, we were able to collect the  
105 whole FRT and measure drug concentrations throughout this organ. In this way, the LICH  
106 system allowed us to run pharmacodynamic (PD) studies simultaneously with

107 pharmacokinetics (PK) analysis at the anatomical and cellular level which revealed  
108 uneven tissue drug distribution and random viral transduction within the PMT FRTs.  
109

## 110 **Results**

### 111 **Transduced cells are present in the ovaries and lymph nodes of TDF-IVR treated** 112 **macaques after a high-dose of SHIV-LiCh challenge.**

113 In this study, we utilized our dual reporter LiCh system pseudotyped with the  
114 HIV-JRFL envelope protein that allowed us to localize and phenotype cells transduced in  
115 untreated rhesus macaques (17) to study TDF-IVR function in our PTM vaginal challenge  
116 model. Briefly, the dual reporter LiCh system carries firefly luciferase (18) and  
117 fluorescent mCherry (19) genes that are driven by a CMV promoter (Fig. S1). IRES  
118 (internal ribosome entry site) enables efficient expression of mCherry gene whereas  
119 WPRE (Woodchucks Hepatitis Virus posttranscriptional regulatory element) at the 3'  
120 end of the genome enables increased gene expression of the vector (20, 21). The 5' end  
121 long terminal repeat (LTR) contains the SIV promoter for efficient virus production. The  
122 3' end LTR site has a self-inactivating mutation. The reporter genome does not contain  
123 any other viral genes and is delivered by a SIV-based lentiviral vector. LiCh pseudotyped  
124 reporter viruses were generated in 293T cells co-transfected with LiCh dual reporter  
125 genome vector, SIV3+ packaging vector, JRFL envelope encoding plasmid and REV  
126 expression plasmid as described in Methods.

127 Two sets of depo provera-treated PTMs were vaginally inoculated with the LiCh  
128 vector ( $10^5$ - $10^6$  TCID<sub>50</sub>) 28 days (pilot study) or 25 days (preclinical study) post TDF-IVR  
129 insertion (Figure 1). The first set of animals was used for pilot analysis (pilot study) and  
130 included 4 TDF-IVR-treated PTMs (BB432, BB588, BB401 and BB925) and 2 control PTMs  
131 with no IVR (BB966 and 96P047). Animals were euthanized 48 hrs after vector challenge.

132 The second set of animals were used to perform in depth PD/PK (preclinical study) and  
133 included 6 TDF-IVR-treated PTMs (BB548, 1.6348, 1.8678, BB187, BB963, BB535) and 1  
134 no-IVR control (BB529). All the animals in the second group were euthanized 72 hours  
135 post viral inoculation to potentially increase the detectable luciferase signal (Figure 1).  
136 The entire intact FRT was collected at necropsy and examined for luciferase activity  
137 using an In Vivo Imaging System (IVIS). We first identify and define unspecific  
138 background signal by IVIS evaluation in the absence of exogenous luciferin. The tissue  
139 was soaked in d-Luciferin, while ovaries were injected with d-Luciferin, and reimaged to  
140 identify specific luciferase activity. Positive signal was found in foci throughout the  
141 entire FRT including vagina, cervix, uterus, ovaries, and inguinal lymph nodes in both 48  
142 hours control animals (96P047 and BB966) from the pilot study. However, no signal was  
143 detected in the control animal (BB529) of the preclinical study necropsied 72hrs after  
144 vector challenge.

145       Luciferase activity in the control animal 96P047 is shown in Figure 2A. The FRT  
146 was then dissected to separate different FRT regions and further cut into smaller pieces  
147 that were reimaged for luciferase activity and then embedded into Optimal Cutting  
148 Temperature (OCT) media. Luciferase signal persisted in several dissected tissue pieces  
149 as shown in Figure 2B. This result is in accordance with our previous study showing the  
150 susceptibility of the entire FRT to viral entry (17). In the animals that were treated with  
151 the TDF-IVR, we detected very low or no luciferase activity in the lower FRT in both the  
152 pilot and preclinical studies. However, luciferase signal was present in the ovaries of six  
153 out of the ten TDF-IVR- protected animals (Table 1). Moreover, signal was also evident



154 in the lymph nodes of three of the ten TDF-IVR-treated animals (Table 1). Luminescence  
155 in the FRT of a representative animal BB548 is shown in Figure 2C-D. The FRT tissue of  
156 all TDF-IVR-treated animals was further dissected into smaller pieces and reimaged as  
157 described above for controls. No additional luminescence was identified in smaller  
158 tissue pieces as shown in Figure 2D for animal BB548. All tissues were stored in OCT  
159 media at -80 °C for further analyses. Luciferase activity throughout the FRTs and lymph  
160 nodes of all animals is summarized in Table 1.

161

162 **Single round infectious virus transduced CD4+ immune cells in ovaries and lymph**  
163 **nodes**

164 An ovary of the control animal BB966 (Figure 3A) and iliac lymph node of the  
165 control animal 96P047 (Figure 3B) were analyzed for the presence of transduced cells by  
166 fluorescent microscopy (Figure 3A, B). mCherry and luciferase positive cells were  
167 identified in both tissues in accordance with the strong luciferase activity observed using  
168 IVIS. Since the ovaries of TDF-IVR-treated animals also presented strong luciferase  
169 activity with IVIS, we analyzed the ovaries of the animals in the preclinical study further  
170 by fluorescent microscopy (Figure 3C, D). We observed multiple areas with a high auto  
171 fluorescence background that is common in ovaries. Thus, we validated the signal using  
172 spectral imaging (maximum emission at around 610 nm for mCherry and 665 nm for  
173 luciferase in CY5, Supplemental Figure 3A, B) and used this criteria to distinguish  
174 between non-specific and specific signal to identify cells transduced by the SHIV-LICH  
175 pseudovirus.

176           The transduced cells were phenotyped by co-staining the tissue with anti- CD4+  
177 antibody. This analysis demonstrated that some cells double positive for mCherry and  
178 luciferase also expressed the CD4+ receptors (Figure 3D). Frequently, more than one  
179 transduced cell was found at locations that were rich in CD4+ cells. Such an example is  
180 presented in Figure 3D. We identified a median of 2 (range 0-8) of transduced cells in  
181 the ovaries of the 6 TDF-IVR treated animals and 2 cells identified in the control animal  
182 (Table 2). The 1.8678 animal was an exception; no mCherry/luciferase positive cells  
183 were present in cryosections of both ovaries, while transduced cells were identified in  
184 both ovaries of the animal number BB535.

185

#### 186 **Pharmacokinetics of the TDF-IVR**

187           Pigtailed macaques were used for both the pilot study and the preclinical study  
188 as shown in Fig 1. The TDF-IVR used was the same that resulted in full protection in a  
189 previous challenge study (13). To ensure we were getting TFV levels similar to the  
190 efficacy study, TFV was measured in vaginal tissue biopsies both proximal and distal to  
191 IVR placement, and in vaginal fluids (VF). The TFV tissue levels were measured from  
192 biopsies collected on days 3, 14 and 30 for the pilot study and from day 15 biopsies in  
193 the preclinical study (Figure 4A). When the IVR was present the TFV levels were around  
194  $10^5$  ng/g of tissue proximal to the IVR placement whereas the distal tissues were about a  
195 log lower. Two days after removal of the IVR the tissue levels dropped 1-2 logs below  
196 from what was observed on day 14/15 of the study but were still approximately  $10^3$  ng/g  
197 of tissue. TFV-diphosphate (TFV-dp), the active intracellular species of TFV, was

198 measured in whole biopsies for the preclinical group on day 15, and from lymphocytes  
199 isolated from vaginal tissue two days after ring removal in the pilot study (Figure 4B).  
200 These values were quite variable (range 10-1000 fmol/mg of tissue and 80-800 fmol/10<sup>6</sup>  
201 isolated lymphocytes) but provide evidence that the TDF is readily converted to TFV-dp  
202 in vaginal tissues. The presence of TFV-dp two days after IVR removal suggests that  
203 some of these cells are retained in the vaginal tissue and are not trafficking to other  
204 tissues. The median TFV levels in VF proximal to the IVR were consistently around 10<sup>6</sup>  
205 ng/mL whereas the median TFV in samples collected distal to the IVR ranged from 10<sup>4</sup> –  
206 10<sup>6</sup> (Figure 4C). These levels are consistent with those reported for the efficacy study  
207 (13).

208 TFV levels at necropsy for the animals in the preclinical study were measured  
209 throughout the FRT and ranged from below LLOQ to 5000 ng/g tissue with a strong  
210 dependence on the proximity of the tissue to the placement of the IVR (Figure 5).  
211 Statistically significant location dependence of tissue drug levels was observed using the  
212 Wilcoxon rank sum test ( $P < 0.0001$ ). Further pairwise testing using the Wilcoxon  
213 method demonstrated that the higher drug levels in the cervix and upper vagina were  
214 not different ( $P = 0.39$ ), but that drug levels in the upper vagina and lower vagina were  
215 different ( $P = 0.01$ ), as were the drug levels in the upper reproductive tract (uterus,  
216 ovaries, fallopian tubes) compared to the upper vagina/cervix ( $P = 0.01$ ) (Figure 5). Thus,  
217 our results demonstrate the gradient of tissue drug levels emanating from the site of  
218 the ring (Figure 5 & 7). We observe lower drug levels in the upper reproductive tract for  
219 all animals. Drug levels in the ovaries, where transduced cells were found in five of the

220 six IVR-treated animals, ranged from below our limit of quantitation (50 ng TFV/g tissue)  
221 to 400 ng TFV/g tissue (Figure 5). The measured levels of TFV throughout the FRT of the  
222 animals in the preclinical study at necropsy were consistent with the levels of TFV in the  
223 vaginal tissues of the macaques from the pilot study collected 48-hrs after SHIV-LICH  
224 challenge (Figure 4A).

225

226 **Complete screen of FRT using nested PCR reveals uneven inhibition of viral reverse**  
227 **transcription by TDF-IVR**

228 We utilized nested PCR methods to survey genital tissues of all animals in the  
229 pre-clinical study (necropsied 72-hours after SHIV-LICH challenge) for proviral DNA  
230 detection. Because animals had been infected with the SHIV162p3 prior to the high-  
231 challenge with LICH vector we designed PCR primers to target IRES and WPRE DNA  
232 elements and mCherry gene, all specific for our viral reporter genome to avoid cross-  
233 detection of SHIV163p2 LTR sites in these animals. Outer PCR products were amplified  
234 between IRES and WPRE elements, while inner PCR products were generated from the  
235 mCherry gene located between IRES and WPRE. Scheme of primer design is represented  
236 in Supplemental Figure 1.

237 To evaluate nested PCR sensitivity, we infected 293T cells with SHIV-based virus  
238 containing the dual reporter genome. As described in methods, infected cells were  
239 selected based on expression of mCherry protein using flow cytometry. Then, mCherry  
240 expressing 293T cells were lysed for DNA isolation. DNA was separately extracted from  
241 non-infected 293T cells. Genomic DNA of both cell types, mCherry positive and 293T

242 wild type cells, were mixed together in a ratio that corresponds to 100 mCherry positive  
243 cells in 250 ng of total DNA per PCR reaction which represents approximately  $3.8 \times 10^4$   
244 cells. Serial dilutions of mixed genomic DNAs were prepared using genomic DNA of wild  
245 type cells to test efficiency of the primers. The lowest DNA dilution corresponded to less  
246 than 1 infected cell per PCR reaction. In this primer efficiency assay we demonstrated  
247 high sensitivity of this method and were able to detect as low as 3 copies of proviral  
248 DNA per 250 ng of genomic DNA (Supplemental Figure 2). As a positive control we  
249 separately amplified LTR elements and we only used these sites for the PCR sensitivity  
250 assay, however not for the screening of animal tissue. The dual reporter genome  
251 contains two LTR elements (Supplemental Figure 1), and we therefore observed higher  
252 PCR sensitivity resulting in detection of less than one copy of proviral DNA in a single  
253 PCR reaction of 293T genomic DNA (Supplemental Figure 2).

254 Our PCR data show that early viral events occurred in an ovary and vaginal and  
255 cervical tissue of the control animal (BB529) (Figure 6A, Table 3) despite detecting no  
256 luciferase activity in these tissues (Table 1). This result suggested that we could find rare  
257 viral events by using a highly sensitive nested PCR method. In support of this, viral  
258 transduction was detected by PCR in an ovary of the IVR treated animal (BB187) that did  
259 not demonstrate luciferase activity (Figure 6A, Table 1). Overall, we detected mCherry  
260 DNA in the ovaries, ovarian lymphatic, fallopian tubes, cervix, vagina and lymph nodes  
261 of studied animals. These data are summarized in the Table 3 and Figure 6B. Five  
262 animals (BB963, BB548, BB187, 1.6348 and 1.8678) of six TDF-IVR treated were positive  
263 for the presence of proviral DNA in cervical and vaginal tissue although none of them

264 was positive for luciferase activity (Table 1). Proviral DNA was also detected in the  
265 ovaries of two animals (BB187 and 1.8678) (Table 3) that were negative for luciferase  
266 signal (Table 1). On the other hand, no viral transduction was identified in ovaries of two  
267 animals (BB548 and BB535) (Table 3) that were positive in the assay of luciferase activity  
268 (Table 1). Since only a few sections of ovaries were used for nested PCR evaluation it is  
269 very likely that pseudoviral transduction did not occur in these sections. Ovarian  
270 lymphatic of two animals (BB548 and 1.8678) and the fallopian tube of an animal  
271 (BB548) were also positive for proviral DNA (Table 3). These data suggest that TDF-IVR  
272 may not completely protect the genital tract of pigtail macaques from a single high viral  
273 dose challenge and demonstrate the location of the initial sites of viral transduction. The  
274 nested PCR data suggest that the highest frequency of proviral DNA appears in cervical  
275 and vaginal tissue sections (Table 3) of TDF-IVR animals.

276         The PCR-data from the 6 PTMs treated with the TFD-IVR in the preclinical study  
277 were overlaid to the IVIS images of the whole FRTs to present early viral events in a  
278 form of 2D FRT maps (Figure 7). To this, the TFV levels obtained from each  
279 corresponding piece of tissue were overlaid to the PCR data to visualize the activity of  
280 the TDF-IVR at the anatomical level. These FRT maps show the highest drug levels in the  
281 middle of the FRT, where the ring was located (upper vagina, endocervix) across all six  
282 preclinical animals. Drug levels decreased in upper (uterus, fallopian tubes, ovaries) and  
283 lower (labia, lower vagina) FRT regions that were distal from the TDF-IVR location.  
284 Furthermore, plus/minus signs on the maps describe positive/negative nested PCR  
285 detections indicating random viral transductions throughout the FRTs regardless of drug

286 levels detected. The number of detected transduced cells in ovaries are noted over each  
287 animal's ovary.  
288

289 **Discussion**

290 In this work we studied the viral events and drug levels at 72-hours after  
291 exposure to a high dose of a non-replicative SHIV-LICh vector to explore how the TDF-  
292 IVR may protect from the earliest events after mucosal transmission. Our SHIV-LICh  
293 system allowed us to detect the initial sites of transduction within the macaque FRT by  
294 three different methods: A) a luciferase-based method via IVIS that allowed a rapid scan  
295 of the entire reproductive tract; B) a fluorescence microscopy-based method that  
296 allowed identification and characterization of single transfected cells, and C) a highly-  
297 sensitive nested PCR method that facilitated the detection of transduction events  
298 (proviral DNA) in the single tissue pieces across all animals. Interestingly, using these  
299 methods, we detect transduction events in the upper (uterus, ovaries, fallopian tubes)  
300 and middle (endocervix, upper vagina) reproductive tract even in TDF-IVR administered  
301 macaques.

302 TFV concentrations in the FRT were variable and were the highest in the tissues  
303 proximal to the ring. Lower drug levels were detected in distal tissues including ovaries.  
304 These results suggest that the upper reproductive tract is a potential site for initial  
305 infection despite the presence of the TDF-IVR.

306 Robust luciferase activity was identified in ovaries, fallopian tubes, and lymph  
307 nodes in seven out of ten IVR-treated animals, while very low luciferase activity was  
308 found in the cervix and vagina. While the IVIS method provides a survey of transduction  
309 events in the FRT, early viral events can only be detected on the surface of the tissue if  
310 multiple cells were transfected in a cluster to produce enough bioluminescence signal



311 [2]. For that reason, a diffuse pattern of single viral transduction cannot be detected  
312 using IVIS. Therefore, further molecular analyses were critical to determine viral  
313 transduction in tissue with low or no luciferase activity detection.

314       Luciferase and mCherry expressing cells were found in the ovaries of five out of  
315 six IVR treated animals from the preclinical study as well as in the non-treated control  
316 animal (BB529). Spectral profiles of both reporter proteins demonstrated specificity of  
317 cells transduced with JRFL pseudotyped SIV virus. This result demonstrates the  
318 importance of the fluorescence microscopy method to confirm early viral events by  
319 finding transduced cells, since luciferase activity assay does not reveal single viral  
320 transduction events. Phenotyping analyses of transduced cells showed expression of  
321 CD4+ receptors in some of the mCherry and luciferase positive cells. This is in  
322 accordance with previously published data showing that CD4+ cells are primary targets  
323 during early infection in FRT (22-24). Furthermore, ovaries of the animal BB548  
324 demonstrated positive luciferase activity, though no transduced cells were detected in  
325 these surveyed ovarian sections of this animal. To increase the likelihood of finding cells,  
326 additional tissue sections should be surveyed for the presence of transduced cells. It is  
327 very likely that some infection sites may be located at the other sites of the ovaries that  
328 were not necessarily included in the sectioning and were therefore not analyzed. Also,  
329 high auto fluorescence within ovarian tissue may have prevented us from identifying  
330 more specific transduced cells.

331       Measurements of the TFV levels throughout the FRT show variation with the  
332 highest levels of TFV accumulating in the upper vagina (maximum 6500 ng TFV/g tissue)

333 and cervix (maximum 10,000 ng TFV/g tissue) near the site of the ring. The maximum  
334 TFV levels in the lower vagina (maximum 2600 ng TFV/g tissue), uterus (250 ng TFV/g  
335 tissue) and ovaries (400 ng TFV/g tissue) are statistically significantly lower compared to  
336 vagina and cervix. Our data suggest the possibility that the ovaries are more permissive  
337 to earliest infection events due to the lower levels of TFV accumulated in these distal  
338 tissue sites. Moreover, the mucus drainage gravitating from the upper toward the lower  
339 reproductive tract probably contributes to decreasing drug levels in the ovaries.

340 The PCR analysis revealed that the entire genital tract except for the uterus was  
341 susceptible to transduction events. In addition to the FRT, proviral DNA was also  
342 detected in the lymph nodes of an animal (BB963), which is consistent with luciferase  
343 activity detected in this same tissue. Luciferase activity was detected also in the lymph  
344 nodes of several other animals (BB432, BB588, BB966 and 96P047) examined in the pilot  
345 study, but the presence of transduction events in these tissues was not confirmed by  
346 nested PCR. Similar findings reporting detection of early transduction events in lymph  
347 nodes of inoculated rhesus macaques were documented in our previous studies (17).

348 Despite the highest drug levels detected around the endocervix and upper vaginal area  
349 where the ring was located, transduction events detected by nested PCR were identified  
350 in these areas in five of the six animals from the preclinical study. This suggests that  
351 achieving higher drug levels in the tissue does not necessarily provide protection from a  
352 high dose of SHIV. Susceptibility of the vaginal vault to infection may be due to  
353 differences in the intracellular environment that is tissue specific. Levels of dATP and  
354 dCTP were shown to be significantly higher in vaginal and cervical tissues compared to

355 rectal tissue (25). Based on these findings, higher concentrations of exogenous  
356 nucleoside analogues such as TFV may be needed to successfully compete with cellular  
357 nucleotides for binding to the viral reverse transcriptase.

358         A limitation of this study is that the use of a single round infectious virus does  
359 not allow us to examine further spread of the virus within the tissue and into the  
360 bloodstream, a hallmark of a productive versus an abortive infection. We hypothesize  
361 that newly recruited immune cells in the FRT may not have accumulated enough drug to  
362 inhibit reverse transcription and protect them from SIV-based vector transduction.  
363 Moreover, migrating cells are by definition highly metabolically active with a high  
364 concentration of dATP and will require more TFV-dp to inhibit virus replication (25, 26).  
365 On the other hand, surrounding immune cells that were present in the FRT for a longer  
366 period and had enough time to accumulate higher drug levels may be better protected  
367 from viral transduction, and might prevent the viral spread outside the FRT that could  
368 result in systemic infection.

369         In order to test this hypothesis, further investigations utilizing replicative viruses  
370 mixed with single round infectious reporter viruses should help us to understand  
371 whether the use of the TDF-IVR ring could prevent viral spread from the first infected  
372 cells to other target cells as revealed by establishment of systemic infection.

373 While this TDF-IVR was shown to protect macaques from infection from multiple low-  
374 dose SHIV challenge (13, 14), we observe incomplete protection from infection by the  
375 TDF-IVR as detected by vaginal challenge with our replication defective dual-reporter  
376 vector. Here we show that early sites of infection are detectable in TDF-IVR

377 administered macaques after a single high dose viral challenge with a replication  
378 defective dual-reporter vector. The need for a single high-dose challenge with the dual-  
379 reporter required for signal detection should be considered in evaluating the outcomes  
380 in this model system. It has been shown in some nonhuman primates challenge studies  
381 that a high viral titer inoculation could overcome a PrEP formulation , while animals  
382 challenged with low viral dose remained protected (27) (28). A long-acting integrase  
383 inhibitor, cabotegravir, was demonstrated to efficiently protect macaques from  
384 repeated low-dose SHIV challenges (27). However, cabotegravir did not completely  
385 protect from a high viral dose challenge (28). Likewise, a long-acting injectable  
386 formulation of rilpivirine was also shown to have decreased efficacy against high viral  
387 dose (29). Furthermore, initial occult infections may be established without detectable  
388 viremia or immune responses in human populations. Studies of an early viral reservoir  
389 were shown to result in systemic viremia after discontinuation of fully suppressive  
390 therapy by ART (30). But the studies of in vivo PK/PD utilizing this system are not  
391 intended to provide insights into the prevention of systemic infection determined by the  
392 detection of viremia. Alternatively, this approach provides insights into topical PrEP  
393 function at the portal of transmission revealing potential deficiencies, such as the  
394 asymmetric distribution of the drug delivered in the vaginal vault by the TDF-IVR.  
395 Further studies will help us to understand the mechanism of protection by comparing  
396 topical drug delivery by TDF-IVR and orally administered TDF in high-challenge model.  
397         Herein, we present a novel system that allows a comprehensive in vivo PK/PD  
398 study of topical PrEP formulations where drug levels and viral inhibition can be directly

399 evaluated. In the current study, the function of a TDF-IVR was evaluated in the PTM  
400 vaginal challenge model with a single high viral dose of a non-replicative SIV based dual-  
401 reporter vector system that allows identification and analysis of potential target cells of  
402 the challenge inoculum. Transduction modeling initial viral events were found in, but  
403 not limited to the ovaries, cervix and vagina as expected based on previous studies (17).  
404 TFV levels were variable throughout the FRT in gradients of reducing tissue  
405 concentrations emanating from the IVR location. The drug released by the IVR in the  
406 vaginal compartment was able to reach the upper reproductive tract including the  
407 ovaries, although lower drug levels were detected. This observation suggests that IVR  
408 delivery systems may not protect the upper FRT as efficiently as the vaginal  
409 compartment. The highest drug concentrations were found proximal to the ring  
410 location; in the ectocervix and upper vagina compartments of the FRT. The detection of  
411 some transduction events overlapping with regions of high tissue drug levels reveal that  
412 viral reverse transcription was not completely inhibited with a high dose viral challenge  
413 despite the highest levels of TFV accumulated in these tissues. This is likely a case of the  
414 use of a single drug in this IVR formulation that competes with endogenous  
415 deoxyadenosine for inhibitory function. Unfortunately, it is not reasonable to address  
416 this issue by increasing the TDF concentrations. As shown in the early termination of  
417 Phase Ib clinical study of this TDF-IVR, ulcerations and significant increases in the levels  
418 of multiple inflammatory cytokines and chemokines in cervicovaginal fluid of sexually-  
419 active women administered with TDF-IVR compared to placebo group revealed drug  
420 release would need to be reduced for safety reasons (16). The high concentrations of

421 TFV near the ring may be causing the observed adverse responses. Based on the insights  
422 gained in this initial study, this in vivo PK/PD approach can contribute important  
423 information to facilitate the development of effective topical PrEP formulations and  
424 maybe even provide insights into why oral PrEP that broadly disseminates drugs may be  
425 advantageous to topical PrEP in protecting high risk populations (1, 31).  
426

## 427 **Materials and Methods**

### 428 **Ethics statement**

429 All animal experiments were conducted in accordance with protocols approved  
430 by Northwestern University and the Centers for Disease Control and Prevention  
431 Institutional Animal Care and Use Committee. This study was conducted with the  
432 recommendations in the Guide for the Care and Use of Laboratory Animals of the  
433 National Institute of Health (NIH).

434

### 435 **TDF-IVR study in non-human primates challenged with high viral dose**

436 Six pigtail macaques were used for the pilot study and seven pigtail macaques for  
437 the preclinical study. All animals were given a single dose of 30 mg Depo-Provera to  
438 synchronize animals in their cycles. Four days later, TDF-IVR were administered to four  
439 animals in pilot study (BB432, BB588, BB401 and BB925) and six animals (BB535, BB963,  
440 BB548, BB187, 1.6348 and 1.8678) in the preclinical study. Two control animals (96P047  
441 and BB966) in the pilot study and one animal (BB529) in preclinical study did not receive  
442 the TDF-IVR. All study animals were vaginally challenged with a high dose of single  
443 round non-replicating SIV-based reporter virus (TCID<sub>50</sub> range: 10<sup>5</sup>-10<sup>6</sup>) twenty-five days  
444 (preclinical study) and twenty-eight days (pilot study) after IVR insertion. After viral  
445 inoculation animals were euthanized at 48 hours (animals in pilot study) and 72 hours  
446 (animals in preclinical study). A timeline for both studies is shown in Figure 1.

447 At necropsy, intact genital tracts and regional lymph nodes were isolated, stored  
448 in RPMI and shipped on wet ice overnight for further processing. The next morning

449 tissue was analyzed for luciferase reporter expression. Whole FRT and lymph nodes  
450 were rinsed in PBS and scanned in the IVIS device to determine the background  
451 luminescence. Then the tissue was soaked in 100 mM d-Luciferin (Biosynth), while  
452 ovaries were injected with 100 mM d-Luciferin. After 10-15minutes at room  
453 temperature all tissue was examined for luciferase expression using IVIS. The genital  
454 tract was further divided into 5 regions: lower vagina, upper vagina/fornix, cervix, uterus  
455 and ovaries including fallopian tubes, and reimaged. Every region of the tissue was then  
456 dissected into smaller pieces and scanned again. Tissue sections with positive luciferase  
457 activity signal were further dissected into smaller bites for the third screen. Live Imaging  
458 Software was used for all analyses of luminescent signals. All dissected tissue was  
459 embedded in optimal cutting temperature (OCT) media (VWR) and frozen at -80 degrees  
460 Celsius. For the preclinical study, ovaries were cryosectioned and screened for the  
461 presence of transduced cells using fluorescence microscopy, while all other dissected  
462 domains of the FRT were used for nested PCR analyzes.

463

#### 464 **SHIV-based dual reporter vector and viral production**

465 In this study we apply a dual reporter genome that allows us to localize and  
466 phenotype cells transduced with a non-replicating SIV-based vector. Vector design was  
467 described previously (17). Briefly, the dual reporter genome carries firefly luciferase (18)  
468 and fluorescent mCherry (19) genes that are driven by a CMV promoter (Supplemental  
469 Figure 1). IRES (internal ribosome entry site) enables efficient expression of the mCherry  
470 gene whereas WPRE (Woodchucks Hepatitis Virus posttranscriptional regulatory



471 element) at the 3' end of the genome enables increased gene expression of the vector  
472 (20, 21). The 5' end long terminal repeat (LTR) contains the SIV promoter for efficient  
473 virus production. The 3' end LTR site has a self-inactivating mutation. The reporter  
474 genome does not contain any other viral genes, and is delivered by an SIV-based  
475 lentiviral vector.

476 An SIV-based pseudovirus vector was driven from the SIV3+ (SIVmac251) as  
477 described in (32). To generate pseudotyped reporter virus the 293T cells were  
478 transfected with 4 plasmids mixed with Polyethylenimine (PEI, Polysciences): dual  
479 reporter genome vector, SIV3+ packaging vector, JRFL envelope encoding plasmid and  
480 REV expression plasmid DM121. 48 hours post transfection supernatant containing  
481 pseudotyped virus was collected and filtered through 0.45 µm-sized pore filters. Virus  
482 was concentrated using a 20% sucrose cushion, followed by titration and infectivity  
483 assay (TCID<sub>50</sub>) on TZM-bl cells as previously described in (33) and stored at -80° C. TCID<sub>50</sub>  
484 ranged from 10<sup>5</sup>-10<sup>6</sup> virions mL<sup>-1</sup>.

485 To identify vector-transduced cells that express mCherry and luciferase reporter  
486 genes frozen ovaries were cryosectioned and immunostained for fluorescence imaging  
487 analyses. mCherry was identified based on its auto fluorescent signal while the  
488 luciferase protein was immuno-stained with anti-firefly luciferase antibody (Abcam)  
489 labeled with Zenon AF647 Mouse Labeling Kit (Life Technology). Positive transduced  
490 cells were identified by detecting high fluorescent signals in both mCherry and CY5  
491 (identifying AF647 labeled antibody for luciferase protein) channels. In addition, we  
492 employed a further criterion using the TRITC filter in an orange wavelength to

493 characterize transduced cells. Dim emission in TRITC excludes detection of a broad-  
494 spectrum auto fluorescence of the tissue indicating specificity of mCherry auto  
495 fluorescence.

496 This viral reporter system was designed for a single round cell entry, viral  
497 transcription and proviral DNA integration. These reporter virions are therefore non-  
498 replicating viruses. This strategy allows us to localize early viral events based on the  
499 expression of reporter genes.

500

#### 501 **Drug levels during the pilot and preclinical studies**

502 Vaginal fluid samples were collected and assayed as previously described (13).  
503 Vaginal pinch biopsies (3-5mm) were collected on days 3 and/or 14/15 for drug level  
504 analysis. A section of vaginal tissues from the FRTs of the first group of macaques was  
505 collected at necropsy and processed by mechanical shearing (34) to isolate leukocytes  
506 for drug analysis at the cellular level. Concentrations of TFV and TFV-DP in vaginal  
507 tissues were determined by LC-MS as previously described (13).

508

509 **Drug PK post necropsy**

510 TFV levels in tissue were measured by LC-MS/MS methods. The LLOQ for TFV  
511 was 50 ng TFV/g tissue. Tissue throughout the female reproductive tract was collected  
512 and sectioned to 100 mg pieces prior to the luciferin treatment. A solution of cold 50:50  
513 acetonitrile:water spiked with 100 ng/mL <sup>13</sup>C labeled TFV internal standard (Moravek,  
514 Brea, California) was added to the tissue with one 5 mm stainless steel homogenizing  
515 bead. Samples were homogenized for 10 min at 30 Hz and centrifuged 4 min at 10,000  
516 rpm. Supernatants were filtered with 0.2 µm Nylon filters and evaporated to dryness on  
517 a vacuum centrifuge. Samples were reconstituted in water and injected on an HPLC-  
518 MS/MS system. Chromatographic separation was achieved using an Agilent Zorbax  
519 Eclipse XDB 2.1x150mm 5µ with mobile phases of 0.1% formic acid in water and 0.1%  
520 formic acid in acetonitrile at 0.3 mL/min with an Agilent 1200 HPLC. Quantification was  
521 achieved using a Bruker AmaZon X Ion Trap with Bruker Compass  
522 DataAnalysis QuantAnalysis version 2.1 software. The assay was linear in the range of  
523 50-5,000 ng/g tissue.

524

525 **Immunostaining and fluorescence microscopy**

526 Sixteen micron thick tissue cryosections were fixed on glass slides with a PIPES-  
527 formaldehyde mix (0.1 M PIPES buffer, pH 6.8 and 3.7 % formaldehyde) and washed  
528 with 1x PBS. Tissue was then blocked with 10% normal donkey serum/0.1% Triton X-  
529 100/0.01% NaN<sub>3</sub> followed by staining with Alexa Fluor 488 conjugated anti-human CD4  
530 OKT 4) antibody (Biolegend) at 4° Celsius overnight (1:200 diluted in PBS). The next

531 morning tissues were rinsed in 1X PBS and stained with rabbit polyclonal anti-firefly  
532 luciferase (Abcam) antibody, pre-labeled with Zenon AlexaFluor -647 mouse labeling kit  
533 according to manufacturer (Life Technology). DAPI was used to stain nuclei.  
534 Immunostained cryosections were mounted with fluorescent mounting medium (DAKO)  
535 and covered with coverslips.

536 Imaging was conducted with a DeltaVision inverted microscope. Transduced cells  
537 were visualized with a 60X objective lens using 2x2 paneled fields. Thirty z-scan stack  
538 images were acquired in 5 channels: DAPI, FITC (AlexaFluor 488), TRITC, mCherry and  
539 CY5 (AlexaFluor647), and deconvolved using softWoRx software (Applied Precision).  
540 Expression of mCherry and luciferase conjugated to AlexaFluor647 were analyzed by  
541 spectral imaging using Nikon AIR Laser scanning confocal microscope and Nikon  
542 Elements Software.

543

#### 544 **Primer efficiency assay and nested PCR**

545 293T cells (American Type Culture Collection) were grown in Dulbecco's modified  
546 Eagle's medium (Mediatech) supplemented with 10% fetal bovine serum, 100 U mL<sup>-1</sup>  
547 penicillin, 100 µg mL<sup>-1</sup> streptomycin and 292 µg mL<sup>-1</sup> l-glutamine (Gibco). At 50%  
548 confluence cells were transduced with 1000 TCID<sub>50</sub> JRFL pseudotyped vector in 10-cm  
549 plates for 24 hours followed by changing the media. Forty-eight hours post transduction  
550 cells were trypsinized, rinsed and collected for selection based on mCherry expression  
551 using a Beckman Coulter MoFlo system.

552 Genomic DNA was isolated from wild type (mCherry negative) and mCherry  
553 positive cells using Qiagen DNeasy Blood & Tissue Kit (Qiagen N.V.). DNA concentration  
554 was measured and calculations were made to prepare a genomic DNA mixture  
555 representing approximately 100 transduced cells and  $3.79 \times 10^4$  wild type cells in a total  
556 of 250 ng DNA corresponding to approximately  $3.8 \times 10^4$  cells. The DNA mixture was  
557 further tittered with genomic DNA of wild type cells and used in a primer efficiency  
558 assay to establish the sensitivity of nested PCR as described below.

559 Approximately three 40micron thick tissue cryosections were used to extract  
560 genomic DNA using above mentioned Qiagen DNeasy Blood & Tissue Kit. Tissue was  
561 analyzed for the presence of mCherry gene in a total of 250 ng DNA per reaction.  
562 DreamTaq polymerase (Promega) and primers were mixed with template DNA.  
563 Two sets of primers were used in this assay. To target the mCherry gene we used IRES  
564 and WPRE outer primers (IRES forward: 5'-ACATGTGTTTAGTCGAGG-3' and WPRE  
565 reverse: 5'-CAGTCAATCTTTCACAAATTTTGTAAATCC -3') and mCherry inner primers  
566 (forward: 5'-CCGACTACTTGAAGCTGTCCTT -3' and reverse: 5'-  
567 GTCTTGACCTCAGCGTCGTAGT -3'). The LTR sites were utilized as a positive control in the  
568 primer efficiency assay only, however not for screening (1) the animals' tissues. Animals  
569 were previously infected with the SHIV162p3, and therefore only the presence of  
570 mCherry proviral DNA is a valid indicator of transduction in the macaque samples. To  
571 amplify the LTR sites we used LTR outer (forward: 5'-GCCTGTCAGAGGAAGAGGTTAG-3'  
572 and reverse: 5'-GCCTTCACTCAGCCGTACTC -3') and LTR inner primers (forward: 5'-

573 TGGCTGACAAGAGGGAACTC -3' and reverse: 5'-CTCCTTCAAGTCCCTGTTCG -3').

574 Supplemental Figure 1 shows primer design on the dual reporter vector.

575 In the first round, PCR outer primers were used to generate outer PCR products.

576 The cycling parameters were: 95 °C for 1 min 30 sec followed by 1 cycle, 95 °C for 30 sec,

577 45 °C for 30 sec and 72 °C for 1 min 50 sec followed by 20 cycles, and 72 °C for 10 min

578 followed by 1 cycle, and the final step 4 °C forever. In the second round of PCR, 2 µL of

579 the first PCR products were amplified with inner primers to generate final PCR products.

580 The cycling parameters were: 95 °C for 5 min followed by 1 cycle, 94 °C for 30 sec, 51 °C

581 for 30 sec and 72 °C for 45 sec followed by 35 cycles, and 72 °C for 5 min followed by 1

582 cycle, and the final step 4 °C forever. The nested PCR was then performed on a Bio-Rad

583 iCycler Thermal Cycler system (Bio-Rad Laboratories).

584 All final PCR reactions were examined on 2% agarose gel and PCR products were

585 visualized by ethidium bromide staining. PCR products were cut out from the gel and

586 DNA was extracted using Quiagen QIAquick Gel Extraction Kit and sequenced with the

587 inner mCherry primers. We then tested sensitivity of the nested PCR method. The

588 primer efficiency assay demonstrated that by using a combination of the IRES/WPRE

589 and mCherry primer sets we were able to detect up to 3 DNA copies per PCR reaction in

590 a total of 250 µg of DNA (Supplemental Figure 2). This corresponds to 3 transduced cells

591 in the mix of the wild type and transduced cells. As a positive control, we designed

592 primers targeting the LTR sites that enable us to identify less than a single copy proviral

593 DNA in our nested PCR reaction (Supplemental Figure 1, 2 ). Amplification of LTR

594 elements resulted in higher production of PCR products because of the two LTR

595 elements on each site of the molecule. Furthermore, amplification of longer PCR  
596 products such as 1.5 kb long fragments between IRES and WPRE elements is less  
597 efficient than amplifying shorter DNA fragments such as 587 bp long outer LTR products.  
598 Despite the high sensitivity of the LTR detection we could not use this set of the LTR  
599 primers to survey the tissue of the pigtail macaques because the animals had been  
600 challenged with SHIV162p4 viral inoculum prior to the beginning of our study. Due to  
601 the similarities of the LTR sequences in the dual reporter SIV-based virus driven from  
602 SIVmac251 and the SHIV162p3 driven from SIVmac239, we couldn't use the LTR primers  
603 to distinguish between the two SIV strains.

604

605 **Supplemental material** is available online only.

606 TEXT S1, DOCX file, 17 KB.

607 FIG S1, PDF file, 50 KB

608 FIG S2, PDF file, 4 MB

609 FIG S3A, PDF file, 122 KB

610 FIG S3B, PDF file, 226 KB

611

## 612 **Acknowledgments**

613 This work made use of the Integrated Molecular Structure Education and Research  
614 facility, which has received support from the SHyNE Resource (NSF ECCS-2025633), the  
615 IIN, and Northwestern's MRSEC program (NSF DMR-1720139). Spectral imaging work  
616 was performed at the Northwestern University Center for Advanced Microscopy

617 generously supported by NCI CCSG P30 CA060553 awarded to the Robert H Lurie  
618 Comprehensive Cancer Center. We thank the Robert H. Lurie Comprehensive Cancer  
619 Center of Northwestern University in Chicago, IL, for the use of the Flow Cytometry Core  
620 Facility, which provided cell sorting service. The Lurie Cancer Center is supported in part  
621 by an NCI Cancer Center Support Grant #P30 CA060553. Professor Elena Martinelli from  
622 Northwestern University for providing her scientific feedback. We acknowledge the  
623 following members of the CDC DHAP Laboratory Branch/Preclinical Evaluation Team for  
624 their contributions to our nonhuman primate research: David Garber, James Mitchell,  
625 Ryan Johnson, Shanon Ellis and Kristen Kelley.

626

627 **Disclaimer.** The findings and conclusions of this manuscript are those of the authors and  
628 do not necessarily represent the official views of the Centers for Disease Control and  
629 Prevention.

630 **Disclosures.** None.

631

632 **Funding Sources:** Funding for this study was provided by the NIH U19 and R37AI094595  
633 grants.

634



## 635 References

- 636 1. Fonner VA, Dalglish SL, Kennedy CE, Baggaley R, O'Reilly KR, Koechlin FM,  
637 Rodolph M, Hodges-Mameletzis I, Grant RM. 2016. Effectiveness and safety of  
638 oral HIV preexposure prophylaxis for all populations. *AIDS* 30:1973-83.
- 639 2. Coelho LE, Torres TS, Veloso VG, Landovitz RJ, Grinsztejn B. 2019. Pre-exposure  
640 prophylaxis 2.0: new drugs and technologies in the pipeline. *Lancet HIV* 6:e788-  
641 e799.
- 642 3. Mayer KH, Molina JM, Thompson MA, Anderson PL, Mounzer KC, De Wet JJ,  
643 DeJesus E, Jessen H, Grant RM, Ruane PJ, Wong P, Ebrahimi R, Zhong L, Mathias  
644 A, Callebaut C, Collins SE, Das M, McCallister S, Brainard DM, Brinson C, Clarke A,  
645 Coll P, Post FA, Hare CB. 2020. Emtricitabine and tenofovir alafenamide vs  
646 emtricitabine and tenofovir disoproxil fumarate for HIV pre-exposure prophylaxis  
647 (DISCOVER): primary results from a randomised, double-blind, multicentre,  
648 active-controlled, phase 3, non-inferiority trial. *Lancet* 396:239-254.
- 649 4. Peter Ruane AC, Frank A. Post, Gabriel Schembri, Heiko Jessen, Benoit Trottier,  
650 Colm Bergin, Jean-Michel Molina, Pamela Wong, Ramin Ebrahimi, Diana  
651 Brainard, Anu Osinusi, Moupali Das, Scott McCallister. Phase 3 Randomized,  
652 Controlled DISCOVER Study of Daily F/TAF or F/TDF for HIV Pre-exposure  
653 Prophylaxis: Week 96 Results, p. *In* (ed),
- 654 5. Abdool Karim Q, Abdool Karim SS, Frohlich JA, Grobler AC, Baxter C, Mansoor LE,  
655 Kharsany AB, Sibeko S, Mlisana KP, Omar Z, Gengiah TN, Maarschalk S,  
656 Arulappan N, Mlotshwa M, Morris L, Taylor D. 2010. Effectiveness and safety of  
657 tenofovir gel, an antiretroviral microbicide, for the prevention of HIV infection in  
658 women. *Science* 329:1168-74.
- 659 6. Marrazzo JM, Ramjee G, Richardson BA, Gomez K, Mgodhi N, Nair G, Palanee T,  
660 Nakabiito C, van der Straten A, Noguchi L, Hendrix CW, Dai JY, Ganesh S, Mkhize  
661 B, Taljaard M, Parikh UM, Piper J, Masse B, Grossman C, Rooney J, Schwartz JL,  
662 Watts H, Marzinke MA, Hillier SL, McGowan IM, Chirenje ZM. 2015. Tenofovir-  
663 based preexposure prophylaxis for HIV infection among African women. *N Engl J*  
664 *Med* 372:509-18.
- 665 7. Baeten JM, Palanee-Phillips T, Brown ER, Schwartz K, Soto-Torres LE, Govender  
666 V, Mgodhi NM, Matovu Kiweewa F, Nair G, Mhlanga F, Siva S, Bekker LG,  
667 Jeenarain N, Gaffoor Z, Martinson F, Makanani B, Pather A, Naidoo L, Husnik M,  
668 Richardson BA, Parikh UM, Mellors JW, Marzinke MA, Hendrix CW, van der  
669 Straten A, Ramjee G, Chirenje ZM, Nakabiito C, Taha TE, Jones J, Mayo A,  
670 Scheckter R, Berthiaume J, Livant E, Jacobson C, Ndase P, White R, Patterson K,  
671 Germuga D, Galaska B, Bunge K, Singh D, Szydlo DW, Montgomery ET, Mensch  
672 BS, Torjesen K, Grossman CI, Chakhtoura N, Nel A, Rosenberg Z, et al. 2016. Use  
673 of a Vaginal Ring Containing Dapivirine for HIV-1 Prevention in Women. *N Engl J*  
674 *Med* 375:2121-2132.
- 675 8. Rees H. 2015. *FACTS 001 Phase III Trial of Pericoital Tenofovir 1% Gel for HIV*  
676 *Prevention in Women.*, vol Boston, MA.

- 677 9. Rees H, Sinead A, Delany-Moretlwe, Lombard C, Baron D, Panchia R, Myer L,  
678 Schwartz JL, Doncel GF, Gray G. 2015. FACTS 001 Phase III Trial of Pericoital  
679 Tenofovir 1% Gel for HIV Prevention in Women., vol Seattle, Washington.  
680 croiconference.org, CROI.
- 681 10. Delany-Moretlwe S, Lombard C, Baron D, Bekker LG, Nkala B, Ahmed K, Sebe M,  
682 Brumskine W, Nchabeleng M, Palanee-Philips T, Ntshangase J, Sibiyi S, Smith E,  
683 Panchia R, Myer L, Schwartz JL, Marzinke M, Morris L, Brown ER, Doncel GF, Gray  
684 G, Rees H. 2018. Tenofovir 1% vaginal gel for prevention of HIV-1 infection in  
685 women in South Africa (FACTS-001): a phase 3, randomised, double-blind,  
686 placebo-controlled trial. *Lancet Infect Dis* 18:1241-1250.
- 687 11. Brown ER, Hendrix CW, van der Straten A, Kiweewa FM, Mgodini NM, Palanee-  
688 Phillips T, Marzinke MA, Bekker LG, Soto-Torres L, Hillier SL, Baeten JM, Team M-  
689 AS. 2020. Greater dapivirine release from the dapivirine vaginal ring is correlated  
690 with lower risk of HIV-1 acquisition: a secondary analysis from a randomized,  
691 placebo-controlled trial. *J Int AIDS Soc* 23:e25634.
- 692 12. Baeten JM, Palanee-Phillips T, Mgodini NM, Mayo AJ, Szydlo DW, Ramjee G, Gati  
693 Mirembe B, Mhlanga F, Hunidzarira P, Mansoor LE, Siva S, Govender V, Makanani  
694 B, Naidoo L, Singh N, Nair G, Chinula L, Parikh UM, Mellors JW, Balan IC, Ngure K,  
695 van der Straten A, Scheckter R, Garcia M, Peda M, Patterson K, Livant E, Bunge K,  
696 Singh D, Jacobson C, Jiao Y, Hendrix CW, Chirenje ZM, Nakabiito C, Taha TE, Jones  
697 J, Torjesen K, Nel A, Rosenberg Z, Soto-Torres LE, Hillier SL, Brown ER, Team M-  
698 HS. 2021. Safety, uptake, and use of a dapivirine vaginal ring for HIV-1  
699 prevention in African women (HOPE): an open-label, extension study. *Lancet HIV*  
700 8:e87-e95.
- 701 13. Smith JM, Rastogi R, Teller RS, Srinivasan P, Mesquita PM, Nagaraja U, McNicholl  
702 JM, Hendry RM, Dinh CT, Martin A, Herold BC, Kiser PF. 2013. Intravaginal ring  
703 eluting tenofovir disoproxil fumarate completely protects macaques from  
704 multiple vaginal simian-HIV challenges. *Proc Natl Acad Sci U S A* 110:16145-50.
- 705 14. Smith JM, Srinivasan P, Teller RS, Lo Y, Dinh CT, Kiser PF, Herold BC. 2015.  
706 Tenofovir disoproxil fumarate intravaginal ring protects high-dose depot  
707 medroxyprogesterone acetate-treated macaques from multiple SHIV exposures.  
708 *J Acquir Immune Defic Syndr* 68:1-5.
- 709 15. Keller MJ, Mesquita PM, Marzinke MA, Teller R, Espinoza L, Atrio JM, Lo Y, Frank  
710 B, Srinivasan S, Fredricks DN, Rabe L, Anderson PL, Hendrix CW, Kiser PF, Herold  
711 BC. 2016. A phase 1 randomized placebo-controlled safety and pharmacokinetic  
712 trial of a tenofovir disoproxil fumarate vaginal ring. *AIDS* 30:743-51.
- 713 16. Keller MJ, Wood L, Billingsley JM, Ray LL, Goymer J, Sinclair S, McGinn AP,  
714 Marzinke MA, Frank B, Srinivasan S, Liu C, Atrio JM, Espinoza L, Mugo N, Spiegel  
715 HML, Anderson PL, Fredricks DN, Hendrix CW, Marrazzo J, Bosinger SE, Herold  
716 BC. 2019. Tenofovir disoproxil fumarate intravaginal ring for HIV pre-exposure  
717 prophylaxis in sexually active women: a phase 1, single-blind, randomised,  
718 controlled trial. *Lancet HIV* 6:e498-e508.
- 719 17. Stieh DJ, Maric D, Kelley ZL, Anderson MR, Hattaway HZ, Beilfuss BA, Rothwangl  
720 KB, Veazey RS, Hope TJ. 2014. Vaginal challenge with an SIV-based dual reporter

- 721 system reveals that infection can occur throughout the upper and lower female  
722 reproductive tract. *PLoS Pathog* 10:e1004440.
- 723 18. Rabinovich BA, Ye Y, Etto T, Chen JQ, Levitsky HI, Overwijk WW, Cooper LJ,  
724 Gelovani J, Hwu P. 2008. Visualizing fewer than 10 mouse T cells with an  
725 enhanced firefly luciferase in immunocompetent mouse models of cancer. *Proc*  
726 *Natl Acad Sci U S A* 105:14342-6.
- 727 19. Shaner NC, Campbell RE, Steinbach PA, Giepmans BN, Palmer AE, Tsien RY. 2004.  
728 Improved monomeric red, orange and yellow fluorescent proteins derived from  
729 *Discosoma* sp. red fluorescent protein. *Nat Biotechnol* 22:1567-72.
- 730 20. Donello JE, Loeb JE, Hope TJ. 1998. Woodchuck hepatitis virus contains a  
731 tripartite posttranscriptional regulatory element. *J Virol* 72:5085-92.
- 732 21. Zufferey R, Donello JE, Trono D, Hope TJ. 1999. Woodchuck hepatitis virus  
733 posttranscriptional regulatory element enhances expression of transgenes  
734 delivered by retroviral vectors. *J Virol* 73:2886-92.
- 735 22. Stieh DJ, Matias E, Xu H, Fought AJ, Blanchard JL, Marx PA, Veazey RS, Hope TJ.  
736 2016. Th17 Cells Are Preferentially Infected Very Early after Vaginal Transmission  
737 of SIV in Macaques. *Cell Host Microbe* 19:529-40.
- 738 23. Gupta P, Collins KB, Ratner D, Watkins S, Naus GJ, Landers DV, Patterson BK.  
739 2002. Memory CD4(+) T cells are the earliest detectable human  
740 immunodeficiency virus type 1 (HIV-1)-infected cells in the female genital  
741 mucosal tissue during HIV-1 transmission in an organ culture system. *J Virol*  
742 76:9868-76.
- 743 24. Hladik F, Sakchalathorn P, Ballweber L, Lentz G, Fialkow M, Eschenbach D,  
744 McElrath MJ. 2007. Initial events in establishing vaginal entry and infection by  
745 human immunodeficiency virus type-1. *Immunity* 26:257-70.
- 746 25. Cottrell ML, Yang KH, Prince HM, Sykes C, White N, Malone S, Dellon ES,  
747 Madanick RD, Shaheen NJ, Hudgens MG, Wulff J, Patterson KB, Nelson JA,  
748 Kashuba AD. 2016. A Translational Pharmacology Approach to Predicting  
749 Outcomes of Preexposure Prophylaxis Against HIV in Men and Women Using  
750 Tenofovir Disoproxil Fumarate With or Without Emtricitabine. *J Infect Dis*  
751 214:55-64.
- 752 26. Hope TJ. 2018. Inflammation weakens HIV prevention. *Nat Med* 24:384-385.
- 753 27. Radzio J, Spreen W, Yueh YL, Mitchell J, Jenkins L, Garcia-Lerma JG, Heneine W.  
754 2015. The long-acting integrase inhibitor GSK744 protects macaques from  
755 repeated intravaginal SHIV challenge. *Sci Transl Med* 7:270ra5.
- 756 28. Andrews CD, Yueh YL, Spreen WR, St Bernard L, Boente-Carrera M, Rodriguez K,  
757 Gettie A, Russell-Lodrigue K, Blanchard J, Ford S, Mohri H, Cheng-Mayer C, Hong  
758 Z, Ho DD, Markowitz M. 2015. A long-acting integrase inhibitor protects female  
759 macaques from repeated high-dose intravaginal SHIV challenge. *Sci Transl Med*  
760 7:270ra4.
- 761 29. Kovarova M, Council OD, Date AA, Long JM, Nochii T, Belshan M, Shibata A,  
762 Vincent H, Baker CE, Thayer WO, Kraus G, Lachaud-Durand S, Williams P,  
763 Destache CJ, Garcia JV. 2015. Nanoformulations of Rilpivirine for Topical

- 764 Pericoital and Systemic Coitus-Independent Administration Efficiently Prevent  
765 HIV Transmission. *PLoS Pathog* 11:e1005075.
- 766 30. Whitney JB, Hill AL, Sanisetty S, Penaloza-MacMaster P, Liu J, Shetty M,  
767 Parenteau L, Cabral C, Shields J, Blackmore S, Smith JY, Brinkman AL, Peter LE,  
768 Mathew SI, Smith KM, Borducchi EN, Rosenbloom DI, Lewis MG, Hattersley J, Li  
769 B, Hesselgesser J, Geleziunas R, Robb ML, Kim JH, Michael NL, Barouch DH. 2014.  
770 Rapid seeding of the viral reservoir prior to SIV viraemia in rhesus monkeys.  
771 *Nature* 512:74-7.
- 772 31. Desai M, Field N, Grant R, McCormack S. 2017. Recent advances in pre-exposure  
773 prophylaxis for HIV. *BMJ* 359:j5011.
- 774 32. Negre D, Mangeot PE, Duisit G, Blanchard S, Vidalain PO, Leissner P, Winter AJ,  
775 Rabourdin-Combe C, Mehtali M, Moullier P, Darlix JL, Cosset FL. 2000.  
776 Characterization of novel safe lentiviral vectors derived from simian  
777 immunodeficiency virus (SIVmac251) that efficiently transduce mature human  
778 dendritic cells. *Gene Ther* 7:1613-23.
- 779 33. Wei X, Decker JM, Liu H, Zhang Z, Arani RB, Kilby JM, Saag MS, Wu X, Shaw GM,  
780 Kappes JC. 2002. Emergence of resistant human immunodeficiency virus type 1  
781 in patients receiving fusion inhibitor (T-20) monotherapy. *Antimicrob Agents*  
782 *Chemother* 46:1896-905.
- 783 34. Pereira LE, Makarova N, Dobard C, Aubert RD, Srinivasan P, McNicholl J, Smith  
784 JM. 2014. Development and optimization of a non-enzymatic method of  
785 leukocyte isolation from macaque tissues. *J Med Primatol* 43:360-3.  
786

787 **Figure Descriptions**

788

789 **Figure 1. Timeline of the studies. All animals were treated with DEPO Provera**

790 **contraceptive 4 days prior to the TDF-IVR insertion.** Animals in the pilot study (96P047,

791 BB966, BB401, BB925, BB432, BB588) were challenged with SHIV reporter virus 28 days

792 after ring insertion and euthanized on day 30. Animals in the preclinical study (BB529,

793 BB535, BB548, BB187, 1.8678, 1.6348, BB963) were challenged with SHIV reporter virus

794 25 days after ring insertion and euthanized on day 28. FRT processing occurred one day

795 after necropsy for both studies.

796

797 **Table 1.** Summary of luciferase reporter expression throughout the FRT and lymph

798 nodes of pigtail macaques analyzed.

799

800 **Figure 2. Luciferase activity in female reproductive tract of pigtail macaques**

801 **challenged with a single high-dose reporter virus expressing Luciferase and mCherry**

802 **genes.** Luciferase activity was induced by soaking the tissue in luciferin and detected

803 using IVIS. **(2A).** Positive signal was identified throughout the FRT in the control animal

804 96P047 (Post-luciferin image). **(2B).** Tissue of the 96P047 animal was dissected into

805 smaller pieces and reimaged. **(3C).** Whole FRT scan of TDV-IVR treated animal BB548.

806 Positive signal was identified in both ovaries. **(2D).** Dissected and reimaged tissue of

807 TDV-IVR treated animal BB548.

808

809 **Figure 3. mCherry and Luciferase expression in the tissue of female reproductive tract**  
810 **of challenged pigtail macaques.** IVIS re-imaged tissue pieces were cryosectioned and  
811 immunostained with anti-Luciferase antibody and DAPI. Immunostained tissue sections  
812 were surveyed using fluorescence microscopy. Luciferase (green) and autofluorescent  
813 mCherry (red) positive cells were identified in right ovary of the BB966 control animal  
814 **(3A)**, iliac lymph node of the 96P047 control animal **(3B)**, ovarian tissue of TDF-IVR  
815 treated animal BB535 **(3C)**, and ovarian tissue of TDF-IVR treated animal BB548, where  
816 transduced cells were phenotyped with anti-CD4 antibody **(3D)**. DAPI was used to stain  
817 nuclei (blue). Specificity of transduction was confirmed by low fluorescent intensity in  
818 TRITC channel.

819

820 **Table 2.** Number of transduced cells (mCherry/luciferase positive) identified in ovaries  
821 of SHIV challenged pigtail macaques that were administered with the TDF-IVR.

822

823 **Figure 4. Drug levels during treatment with IVR**

824 **4A.** TFV levels as measured by LC-MS/MS from vaginal tissue biopsies collected on days  
825 3 and 14 post IVR insertion, and vaginal tissue sections collected at necropsy (day 30) for  
826 the pilot study. In the preclinical study biopsies were collected on day 15. **4B.** TFV-DP  
827 concentrations were determined in whole tissue (day15) and leukocytes isolated from  
828 processed vaginal tissues (day30). **4C.** TFV levels from sites proximal and distal to IVR  
829 placement.

830

831 **Figure 5. Post-necropsy TFV levels in macaque tissue.**

832 TFV levels as measured by LC-MS/MS at necropsy for the preclinical study as a function  
833 of location in the FRT.

834

835 **Figure 6. Nested PCR screening results**

836 Dissected tissue of the entire FRT and lymph nodes were cryosectioned for DNA  
837 extraction following nested PCR. Each dissected tissue piece was surveyed for the  
838 presence of proviral DNA (mCherry gene) copy in total of 250 ng DNA per reaction in at  
839 least 12 PCR reactions. **(6A)** 250 bp long PCR products visualized in gel and sequenced  
840 using mCherry primers for naïve animal, control animal BB529 (vagina and cervix), and  
841 IVR-treated animals BB187 (ovary) and BB963 (lymph node). **(6B)** Summary of proviral  
842 DNA detection using nested PCR throughout FRT and lymph nodes.

843

844 **Table 3.** Number of proviral DNA detected throughout the entire FRT and lymph nodes  
845 of Pigtail Macaques challenged with a single high dose of SHIV.

846

847 **Figure 7. Summary of FRT post-necropsy analyzes.** FRT 2D-maps of animals

848 administered with TDF-IVR in preclinical study. Pigtail macaques were treated with TDF-  
849 IVR for 28 days. On day 25 post TDF-IVR insertion animals were vaginally challenged  
850 with a single high viral dose ( $10^5$ - $10^6$ ). 72 hrs later animals were scarified and FRTs were  
851 analyzed using three different methods. Data of all three methods is presented on FRT  
852 maps and it corresponds to tissue locations: i) tissue TFV concentrations measured by

853 LC-MS/MS (squares), ii) proviral DNA detected by nested PCR (+/-), and iii) number of  
854 transduced cells (next to the white arrows pointing toward ovaries) identified by  
855 fluorescence microscopy.

856

## 857 **SUPPLEMENTAL FIGURES**

858

859 **Fig. S1.** Scheme of dual reporter genome LICh and primer design for nested PCR.

860

861 **Fig. S2.** Primer efficiency assay. Genomic DNA mixture representing 100 infected cells in  
862 250 ng DNA was further diluted and used in primer efficiency assay using IRES/WPRE  
863 and mCherry primer set and LTR primers as a positive control

864

865 **Fig. S3.** Spectral profile analyzes of transduced cells. Spectral emission profile matching  
866 the defined profile of mCherry (610 nm) and luciferase seen in CY5 (665 nm) of ovarian  
867 tissue of TDF-IVR-treated animal BB535 (3A) and BB548 (3B).



**Simultaneous *in vivo* Pharmacokinetics and Pharmacodynamics in a  
High-dose Vaginal Challenge of TDF Intravaginal Ring Treated  
Macaques**

Figures

Figure 1 Timeline of the studies

Pigtail Macaques:

Control, n=2  
(96PO47, BB966)

TDF IVRV, n=4  
(BB401, BB432,  
BB588, BB925)

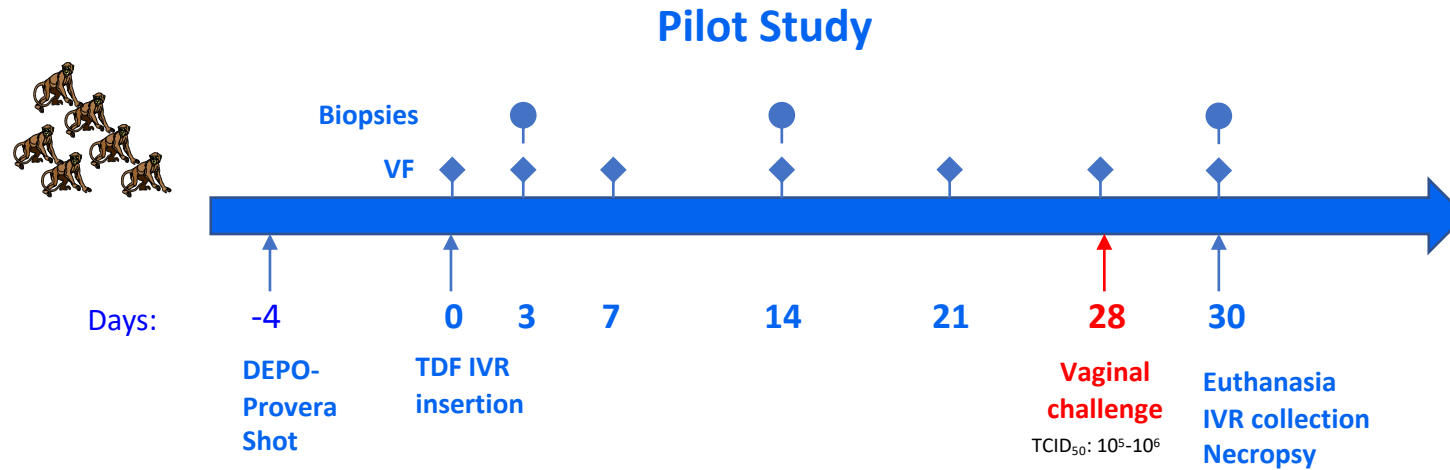

Pigtail Macaques:

Control, n=1  
(BB529)

TDF IVR, n=6  
(BB535, BB548,  
BB187, BB963,  
1.8678, 1.6348)

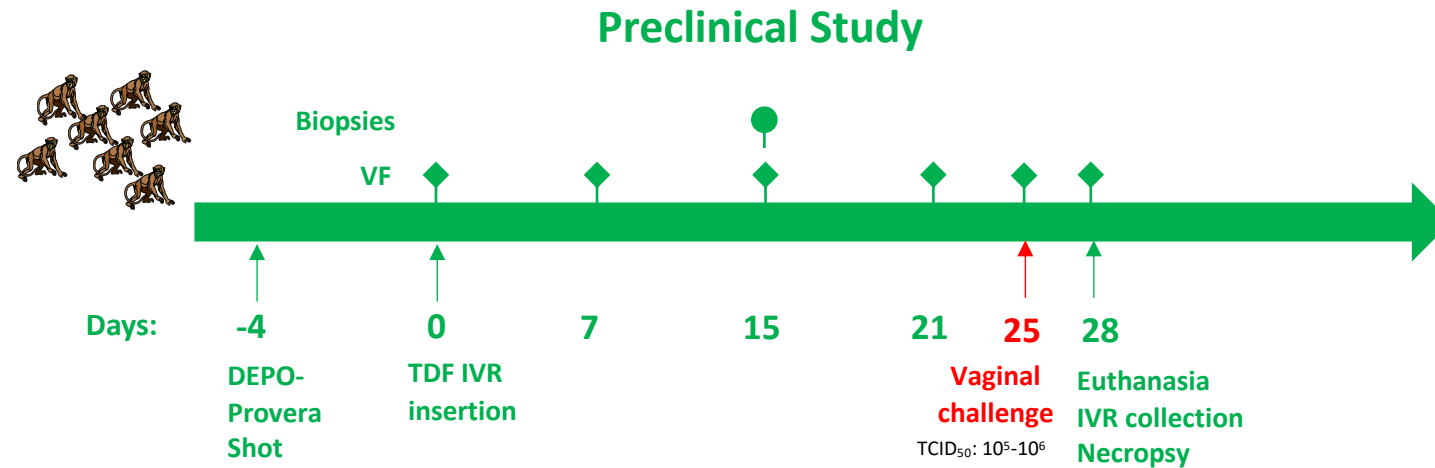

Figure 2A

# Luciferase activity detected throughout the FRT of control animal (96P047)

Pre-Luciferin

Post-Luciferin

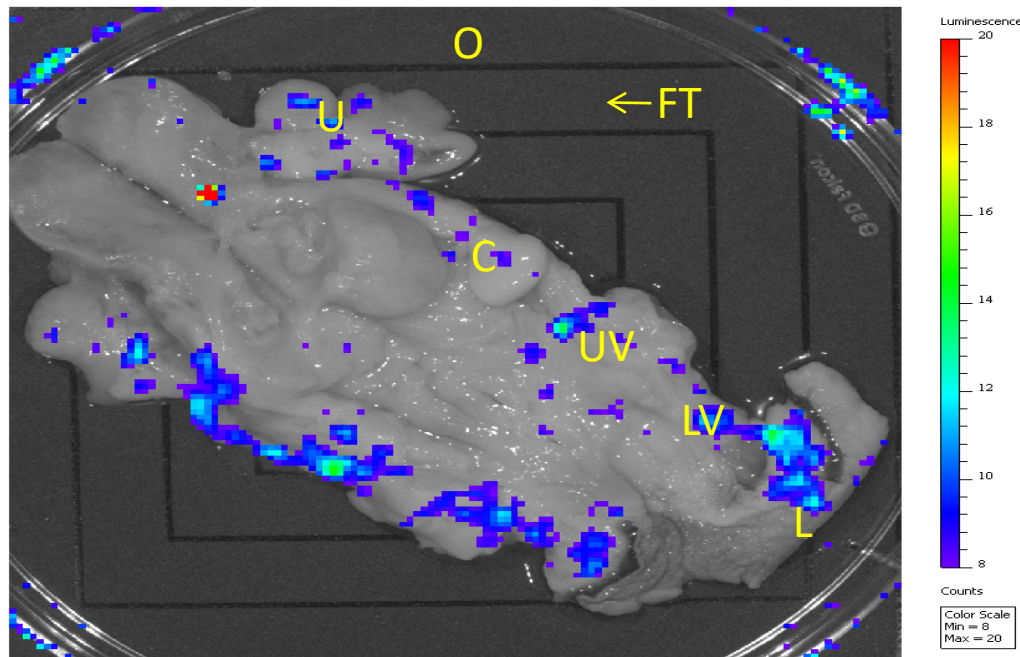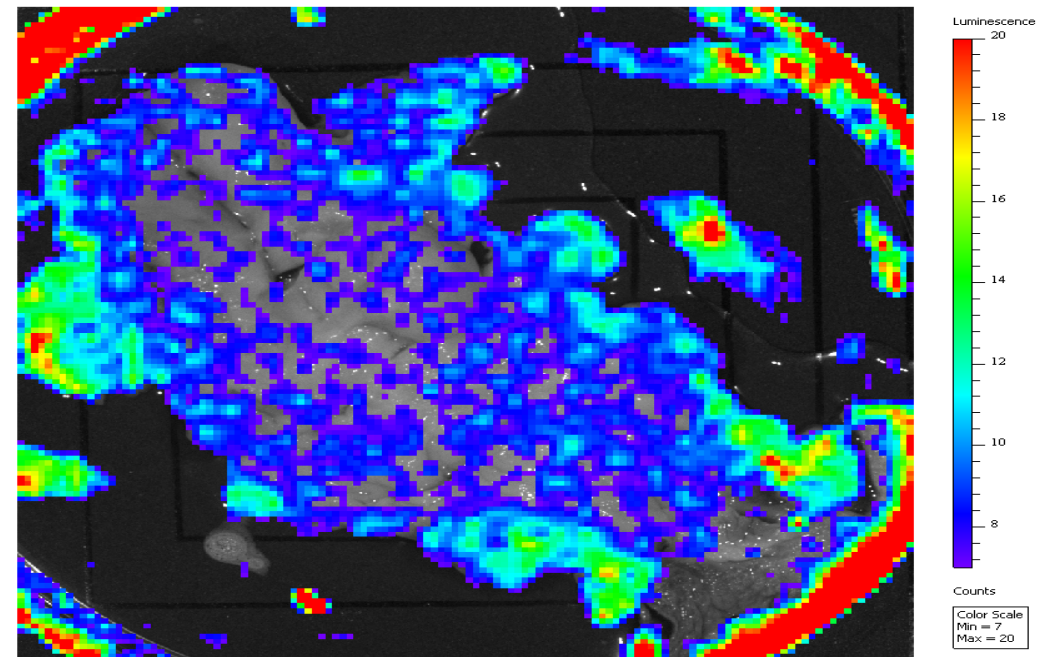

L - Labia  
LV - Lower Vagina  
UV - Upper Vagina  
C - Cervix  
U - Uterus  
O - Ovary  
FT - Fallopian Tube

Figure 2B

# Luciferase activity in dissected tissue of control animal (96P047)

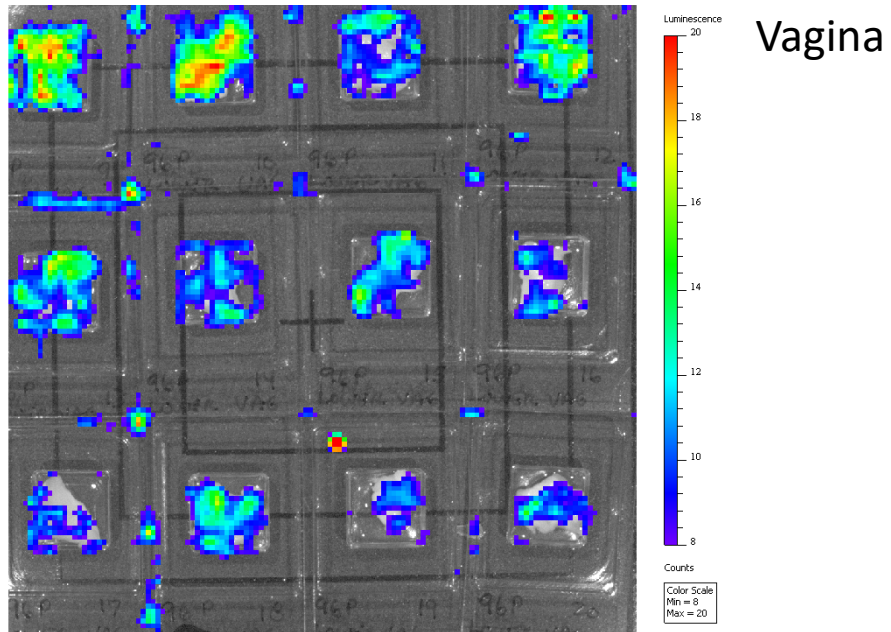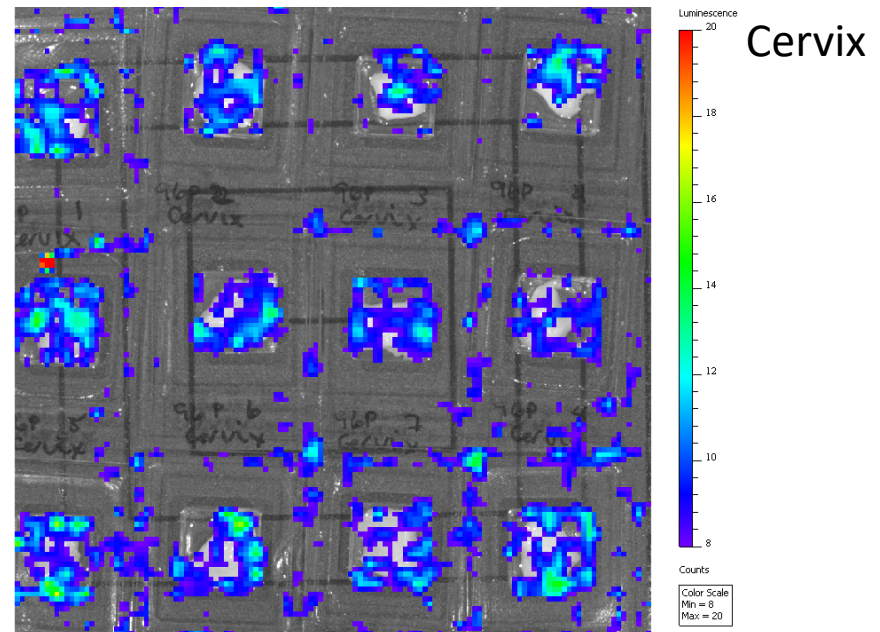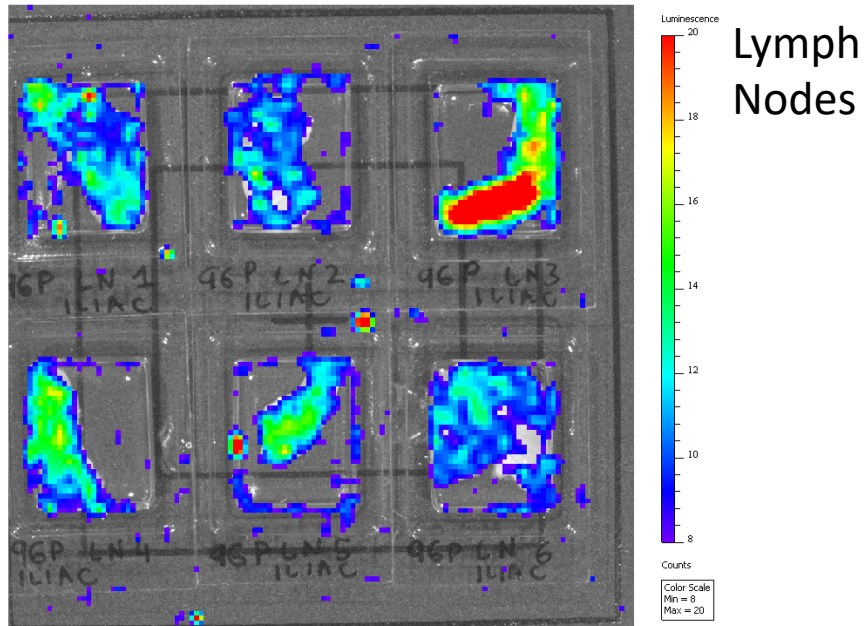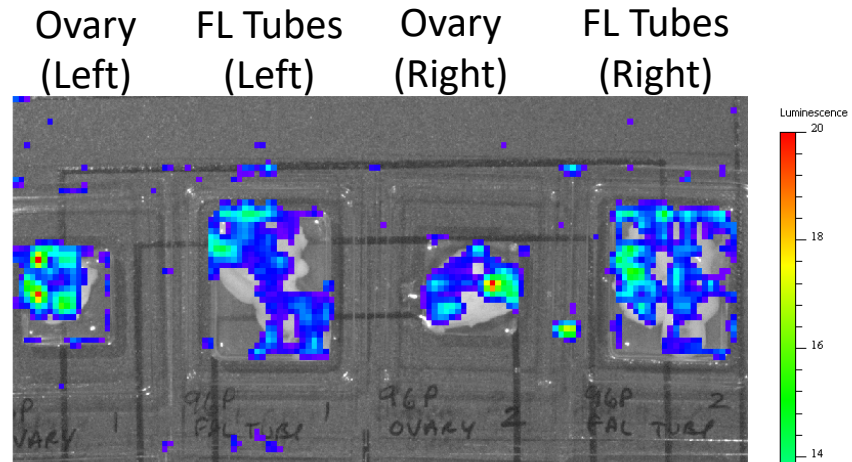

Figure 2C

# Luciferase activity in whole FRT of TDF-IVR administered animal (BB548)

Pre-Luciferin

Post-Luciferin

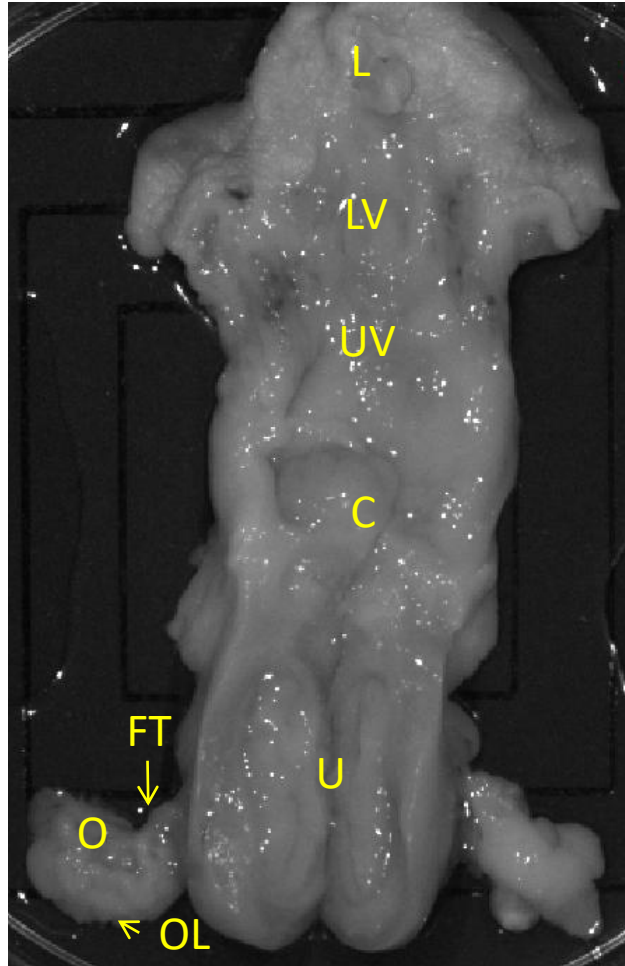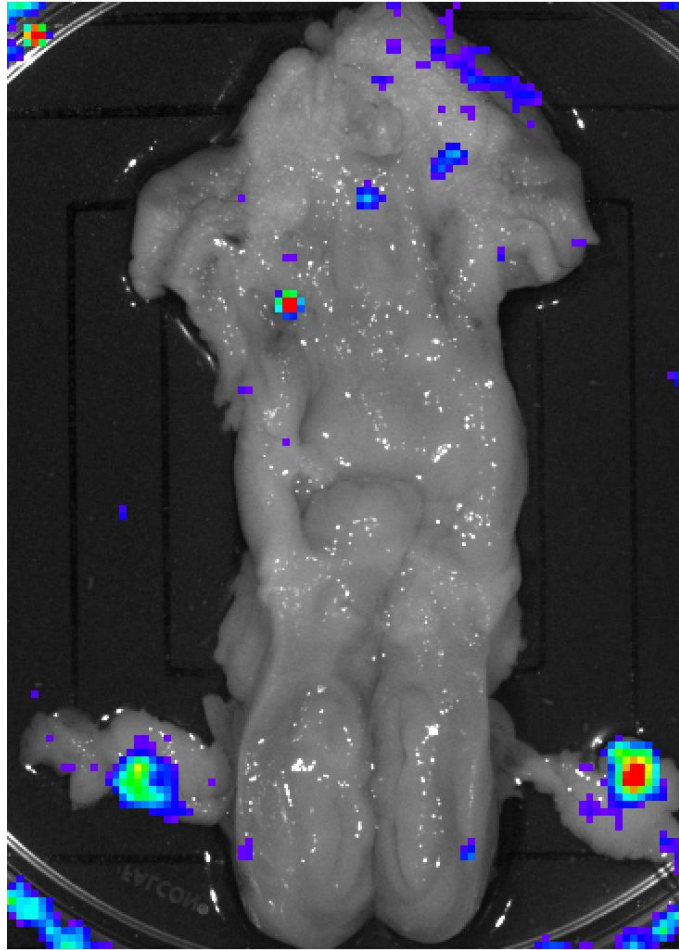

Left and right ovaries  
in halves

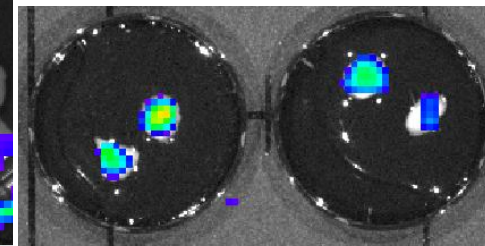

Luminescence

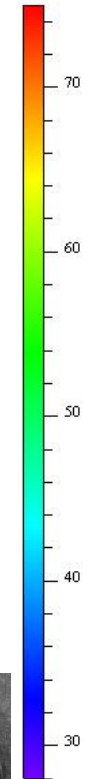

Counts

Color Scale  
Min = 28  
Max = 75

L - Labia

LV - Lower Vagina

UV - Upper Vagina

C - Cervix

U - Uterus

O - Ovary

FT - Fallopian Tube

OL - Ovarian Lymphatic

Figure 2D

# Luciferase activity in dissected tissue of TDF-IVR administered animal (BB548)

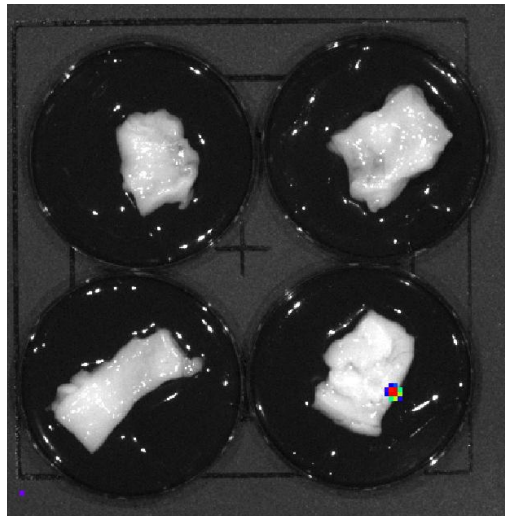

Lower vagina

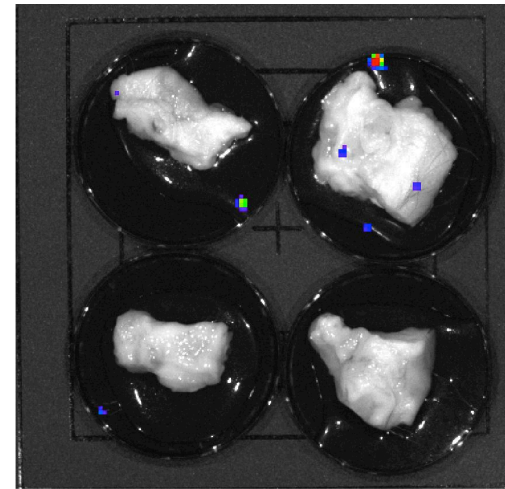

Upper vagina

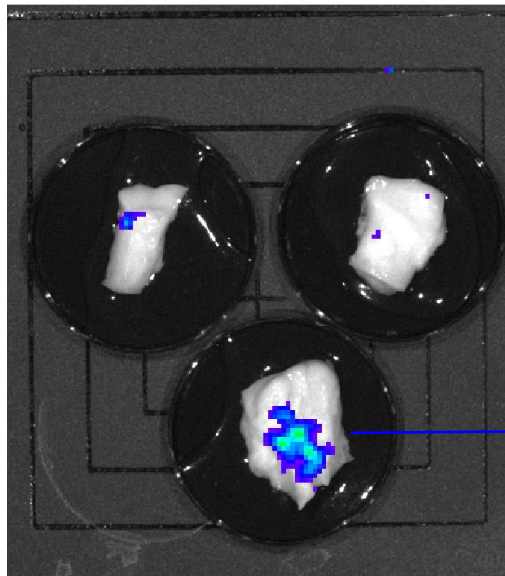

Cervix

Dissected piece of cervix

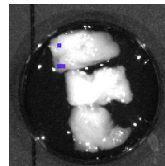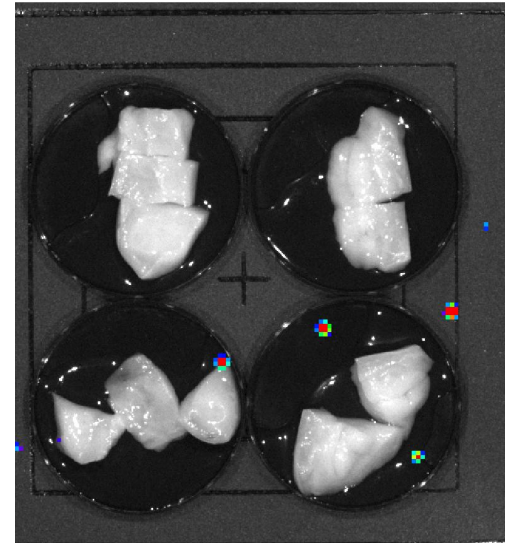

Uterus

Table 1

## Summary of luciferase activity detection throughout the FRT and lymph nodes using IVIS

| Animal code     | 96P047 | BB966 | BB529 | BB401 | BB925 | BB432 | BB588 | BB535 | BB548 | BB187 | 1.8678 | 1.6348 | BB963 |
|-----------------|--------|-------|-------|-------|-------|-------|-------|-------|-------|-------|--------|--------|-------|
| TDF IVR         |        |       |       | +     | +     | +     | +     | +     | +     | +     | +      | +      | +     |
| Ovaries         | ++     | ++    | -     | ++    | ++    | ++    | ++    | +     | ++    | -     | -      | -      | -     |
| Fallopian Tubes | ++     | ++    | -     | ++    | ++    | ++    | ++    | -     | -     | -     | -      | -      | -     |
| Uterus          | +      | +     | -     | -     | -     | -     | -     | -     | -     | -     | -      | -      | -     |
| Cervix          | +      | +     | -     | -     | -     | -     | -     | -     | -     | -     | -      | -      | -     |
| Vagina          | +      | +     | -     | -     | -     | -     | -     | -     | -     | -     | -      | -      | -     |
| Lymph Nodes     | +      | +     | -     | -     | -     | +     | +     | -     | -     | -     | -      | -      | +     |

++ : strong luciferase activity

+ : moderate luciferase activity

- : very low to no luciferase activity

Figure 3A

mCherry and Luciferase expression in right ovary of control animal (BB966)

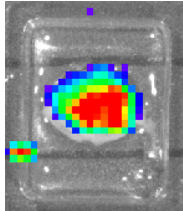

Luciferase activity throughout the entire ovary detected by IVIS

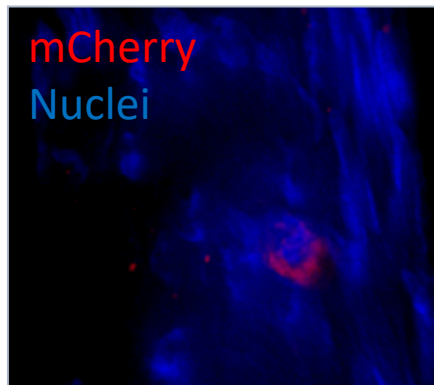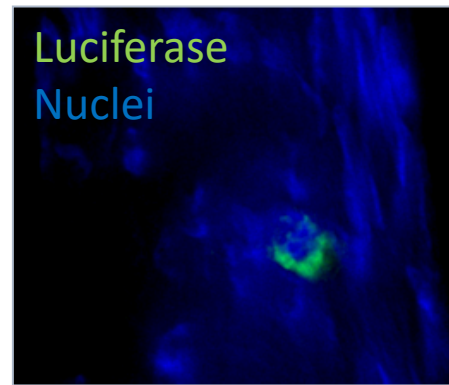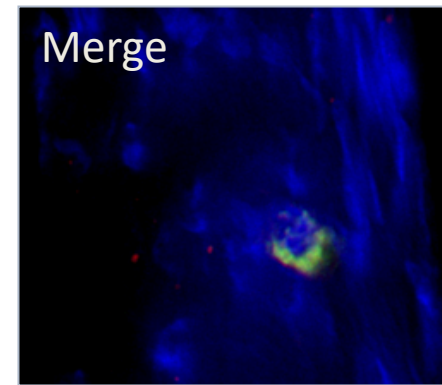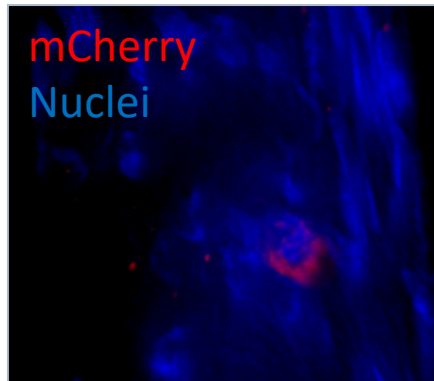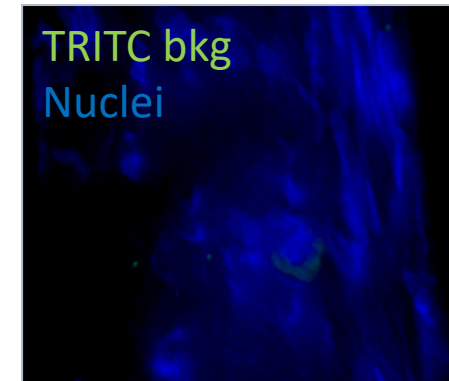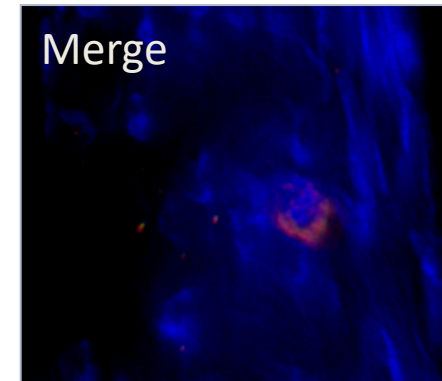



Figure 3B

# mCherry and luciferase expression in Iliac Lymph Node of control animal (96P047)

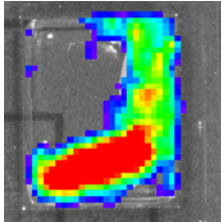

Luciferase activity throughout the entire Iliac lymph node detected by IVIS

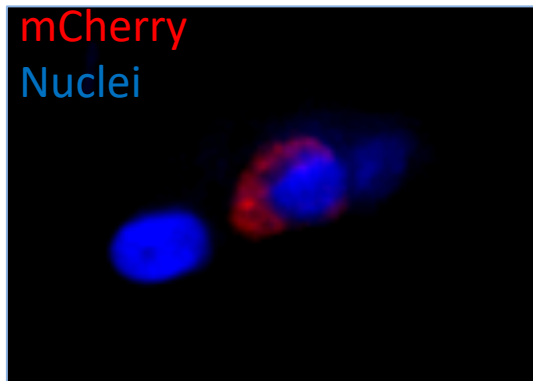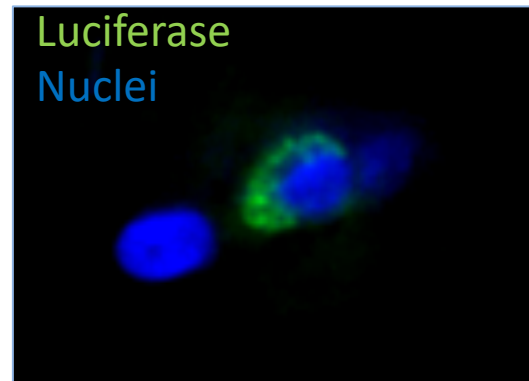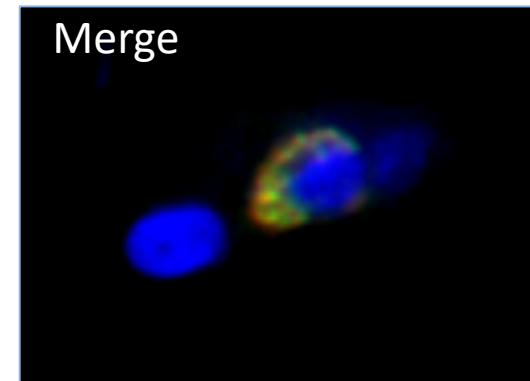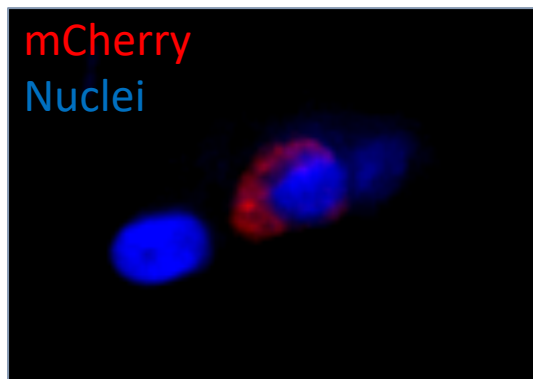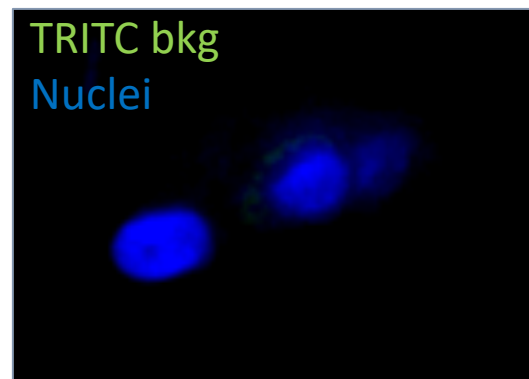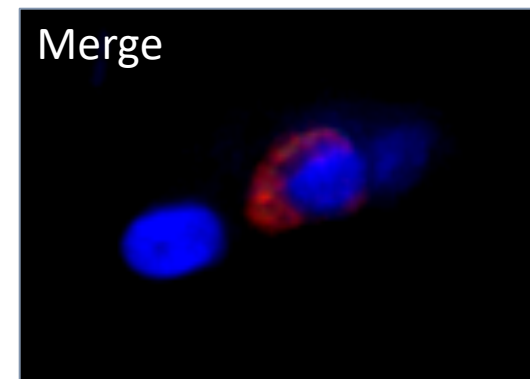

Figure 3C

mCherry and Luciferase expression in ovary of TDF-IVR administered animal (BB535)

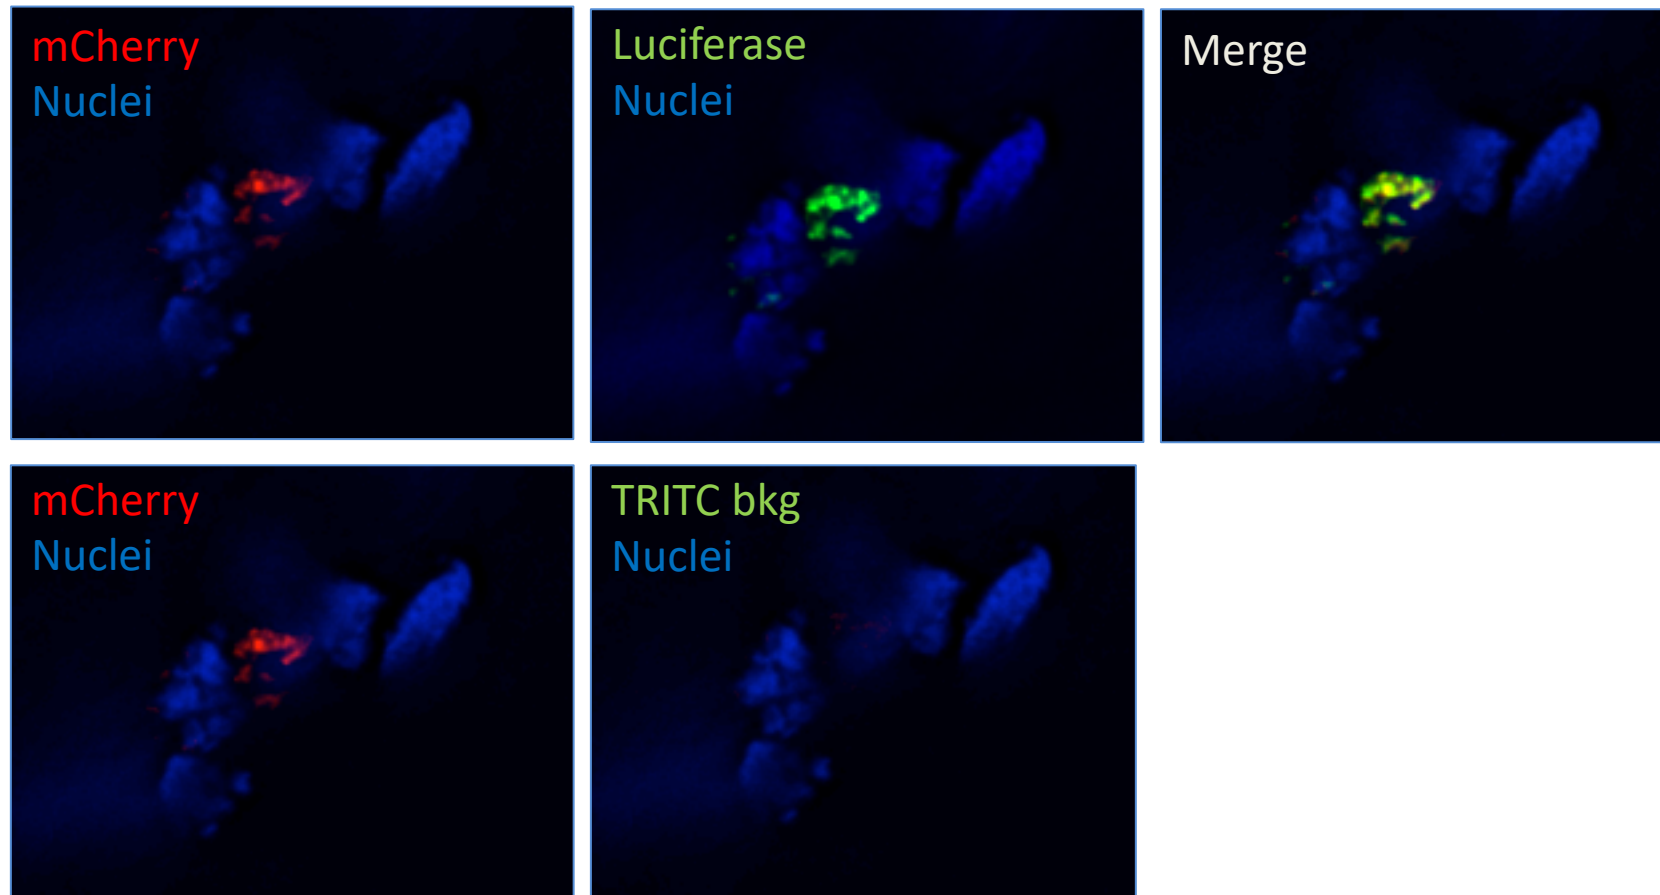

Figure 3D

mCherry and Luciferase expressing cells are CD4 positive in an ovary of TDF-IVR administered animal (BB548)

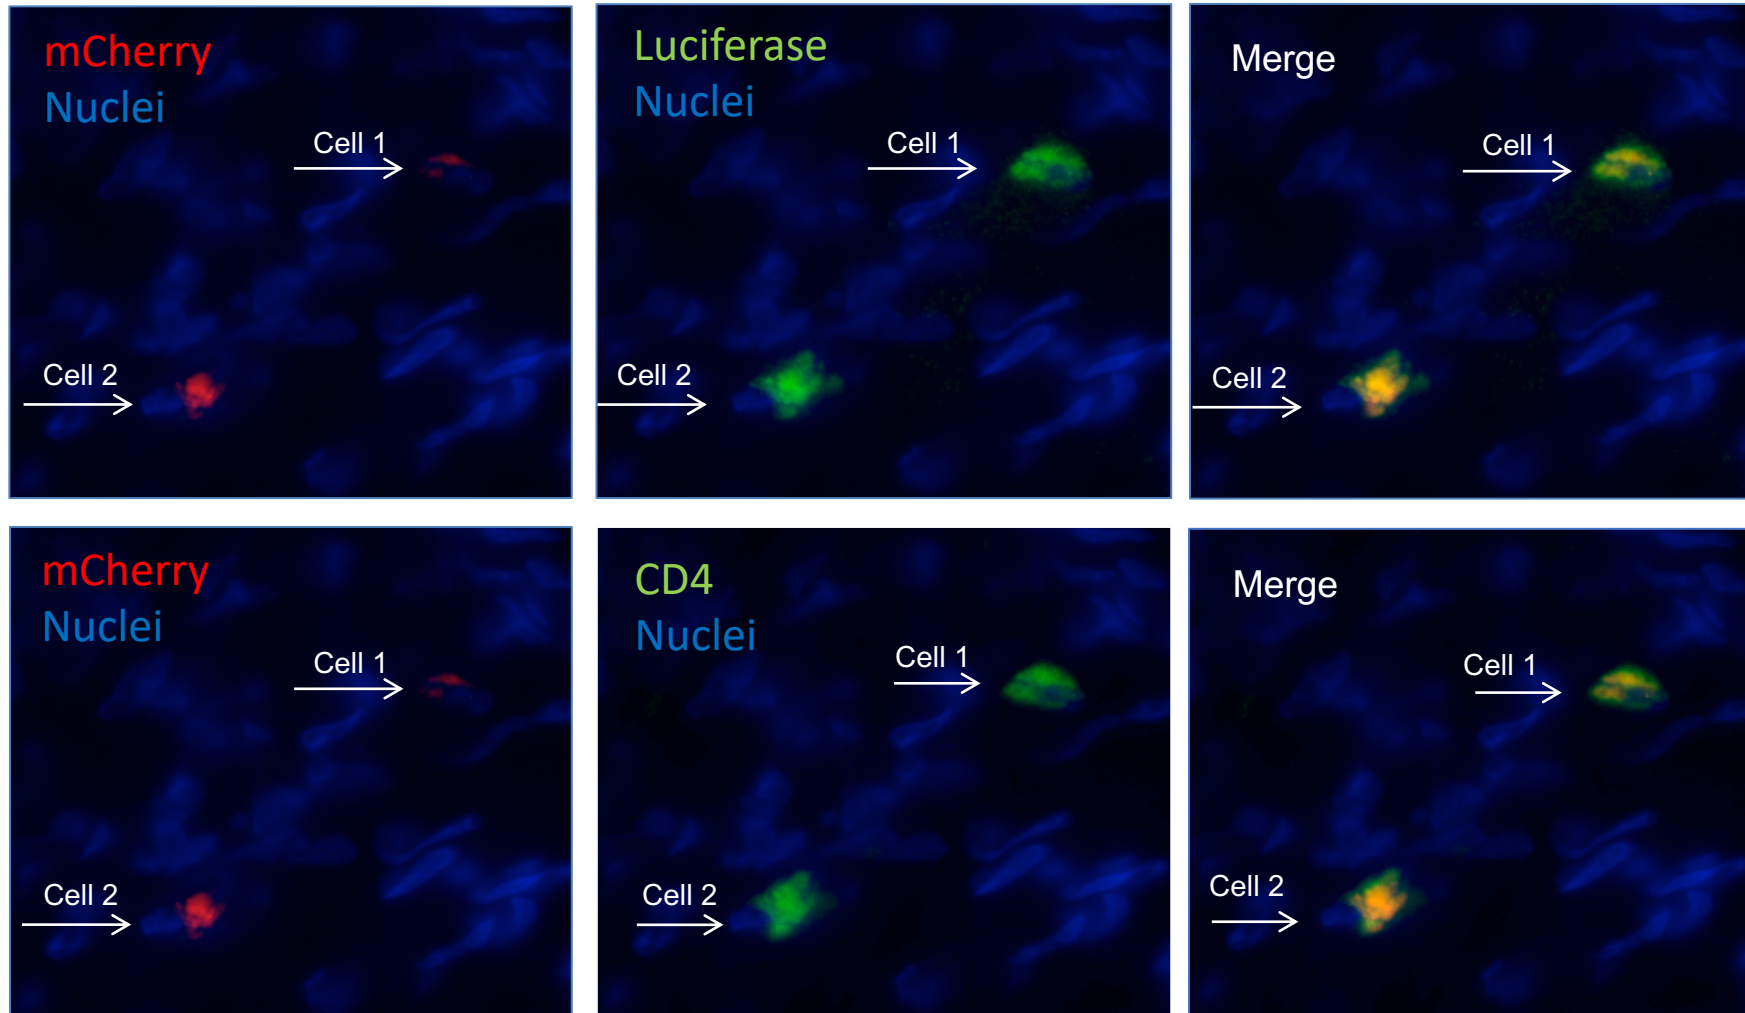

Table 2

Summary of identified transduced cells (Luciferase and mCherry positive) in ovaries of animals challenged with a single high dose of SHIV virus.

| Animal code:<br>TDF IVR | <b>BB529</b> | <b>BB535</b> | <b>BB548</b> | <b>BB187</b> | <b>1.8678</b> | <b>1.6348</b> | <b>BB963</b> |
|-------------------------|--------------|--------------|--------------|--------------|---------------|---------------|--------------|
|                         | -            | +            | +            | +            | +             | +             | +            |
| <b>Ovary 1</b>          | <b>2</b>     | <b>8</b>     | <b>2</b>     | <b>1</b>     | <b>0</b>      | <b>4</b>      | <b>1</b>     |
| <b>Ovary 2</b>          | -            | <b>2</b>     | <b>0</b>     | <b>0</b>     | <b>0</b>      | -             | -            |

Number of cells found per ovary

- : Tissue not available for screening

Figure 4A

TFV tissue levels from biopsies on day 3, 14, 30 in animals in pilot study; and on day 15 in animals in preclinical study.

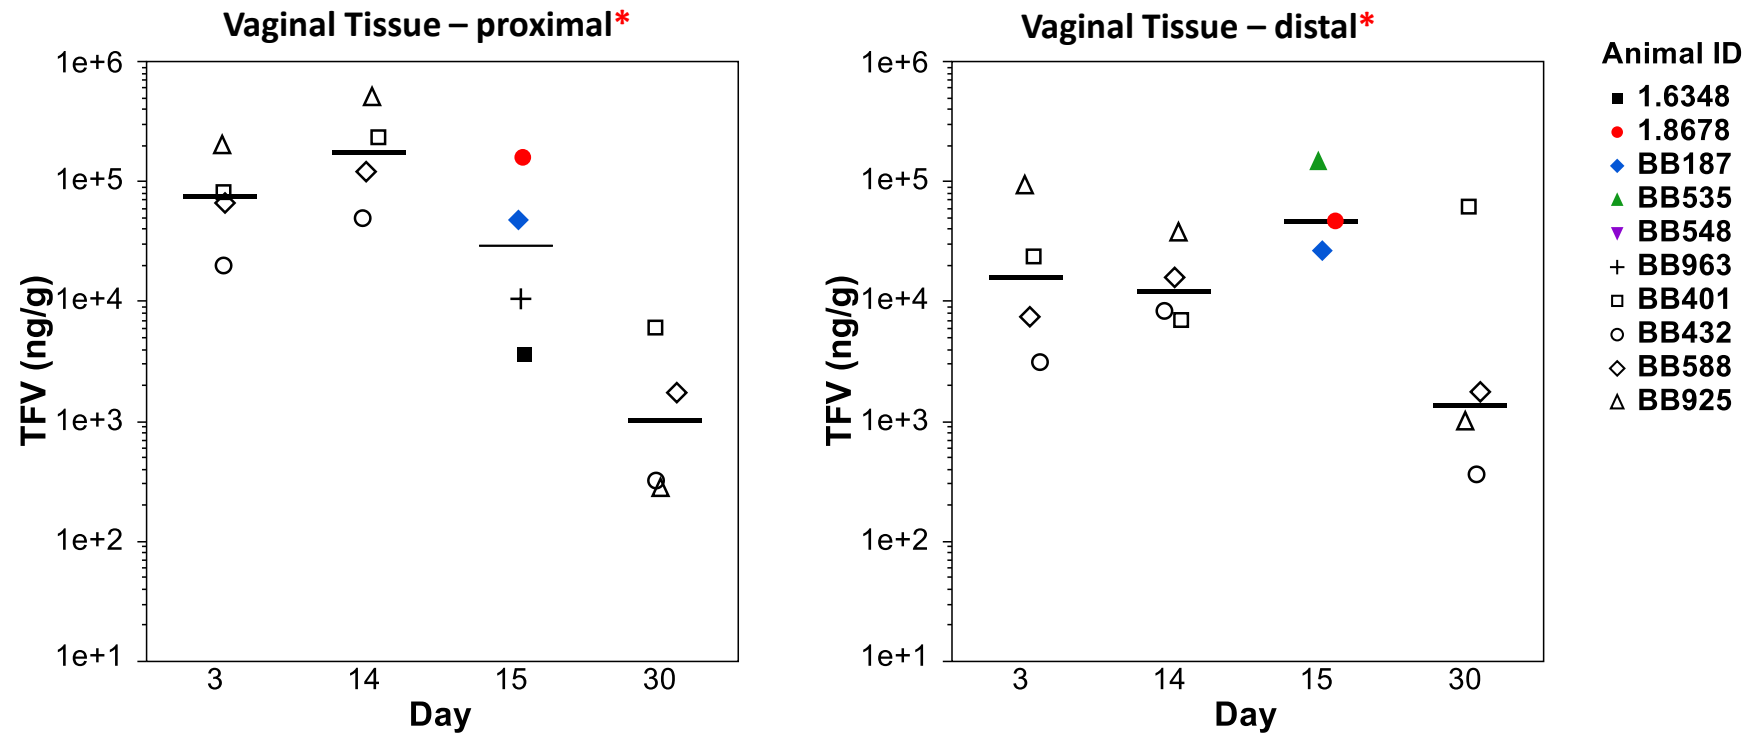

\*Two samples (2 of 18) below LOQ

\*Three samples (3 of 18) below LOQ

Figure 4B

# TFV-DP tissue levels from biopsies in animals in pilot study

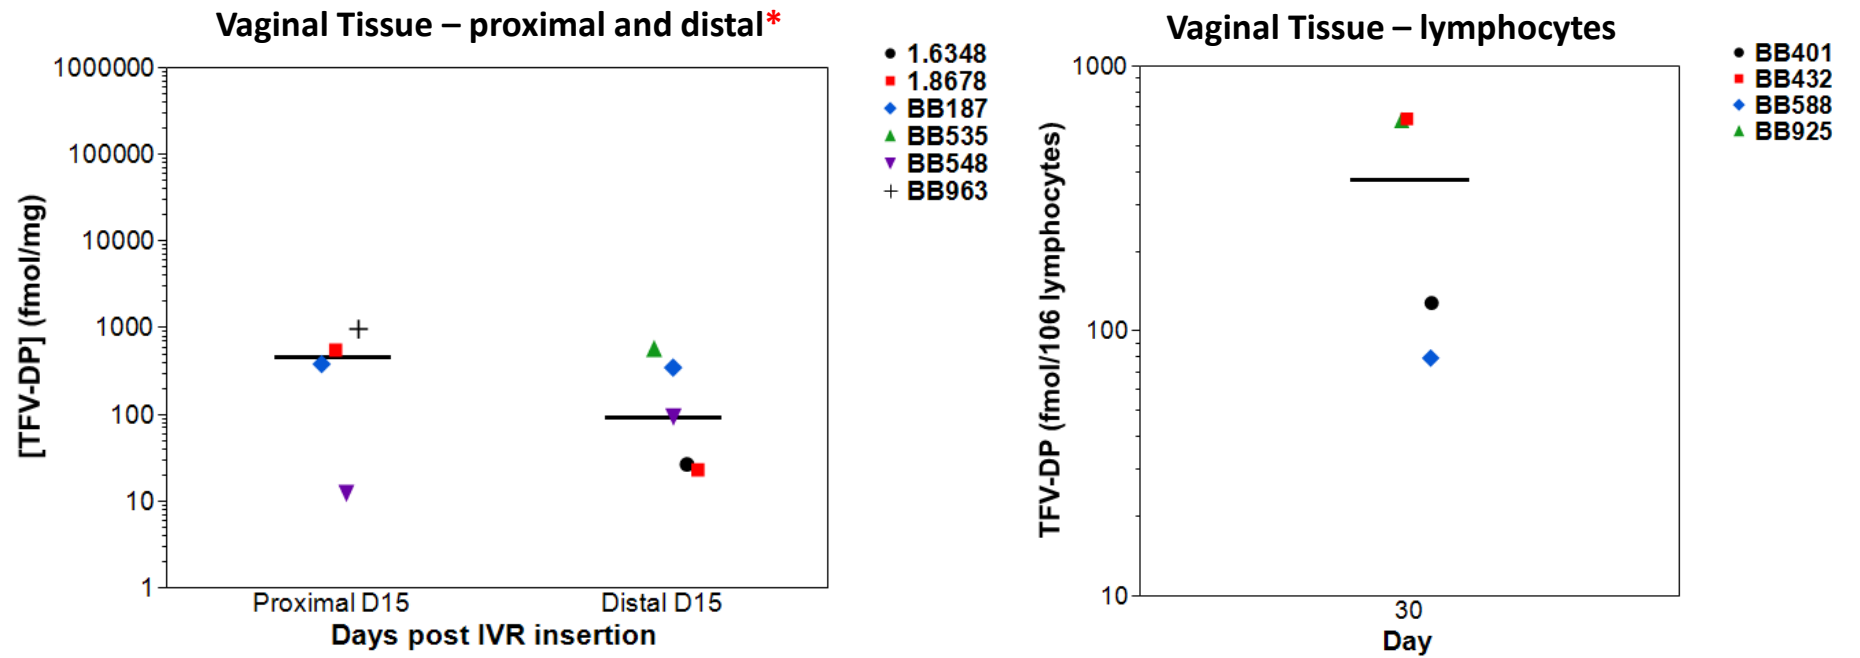

\*Three samples (3 of 12) below LOQ

Figure 4C

### TFV vaginal sponge levels of animals (72 hrs post challenge)

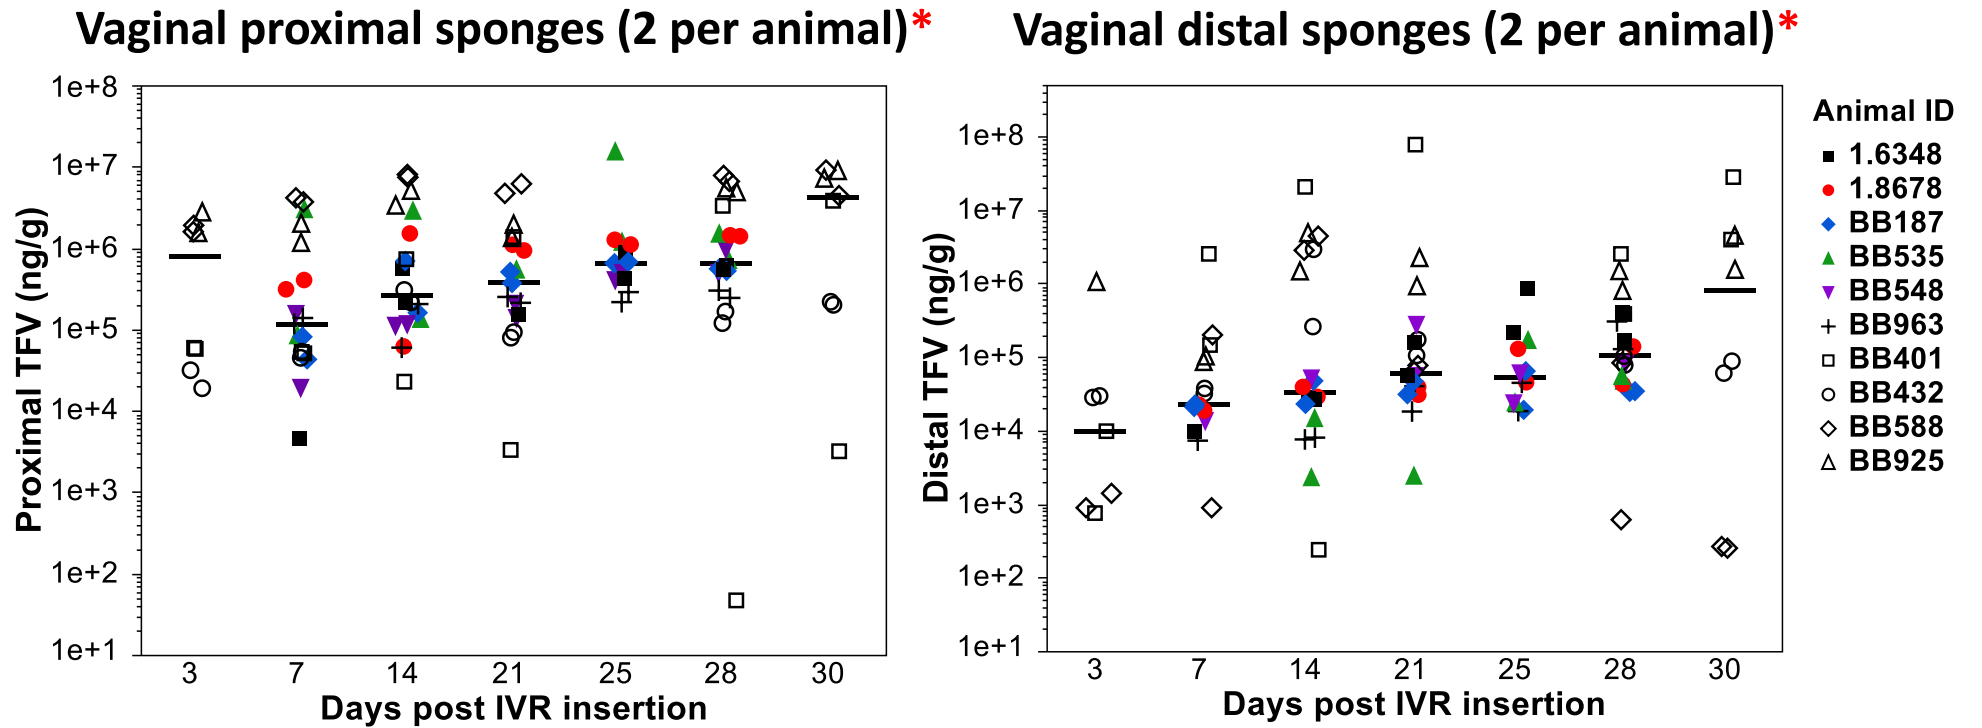

\*Some samples (3/108) below LOQ

\*Some samples (9/108) below LOQ

Figure 5

## Post-necropsy TFV levels in macaque tissue

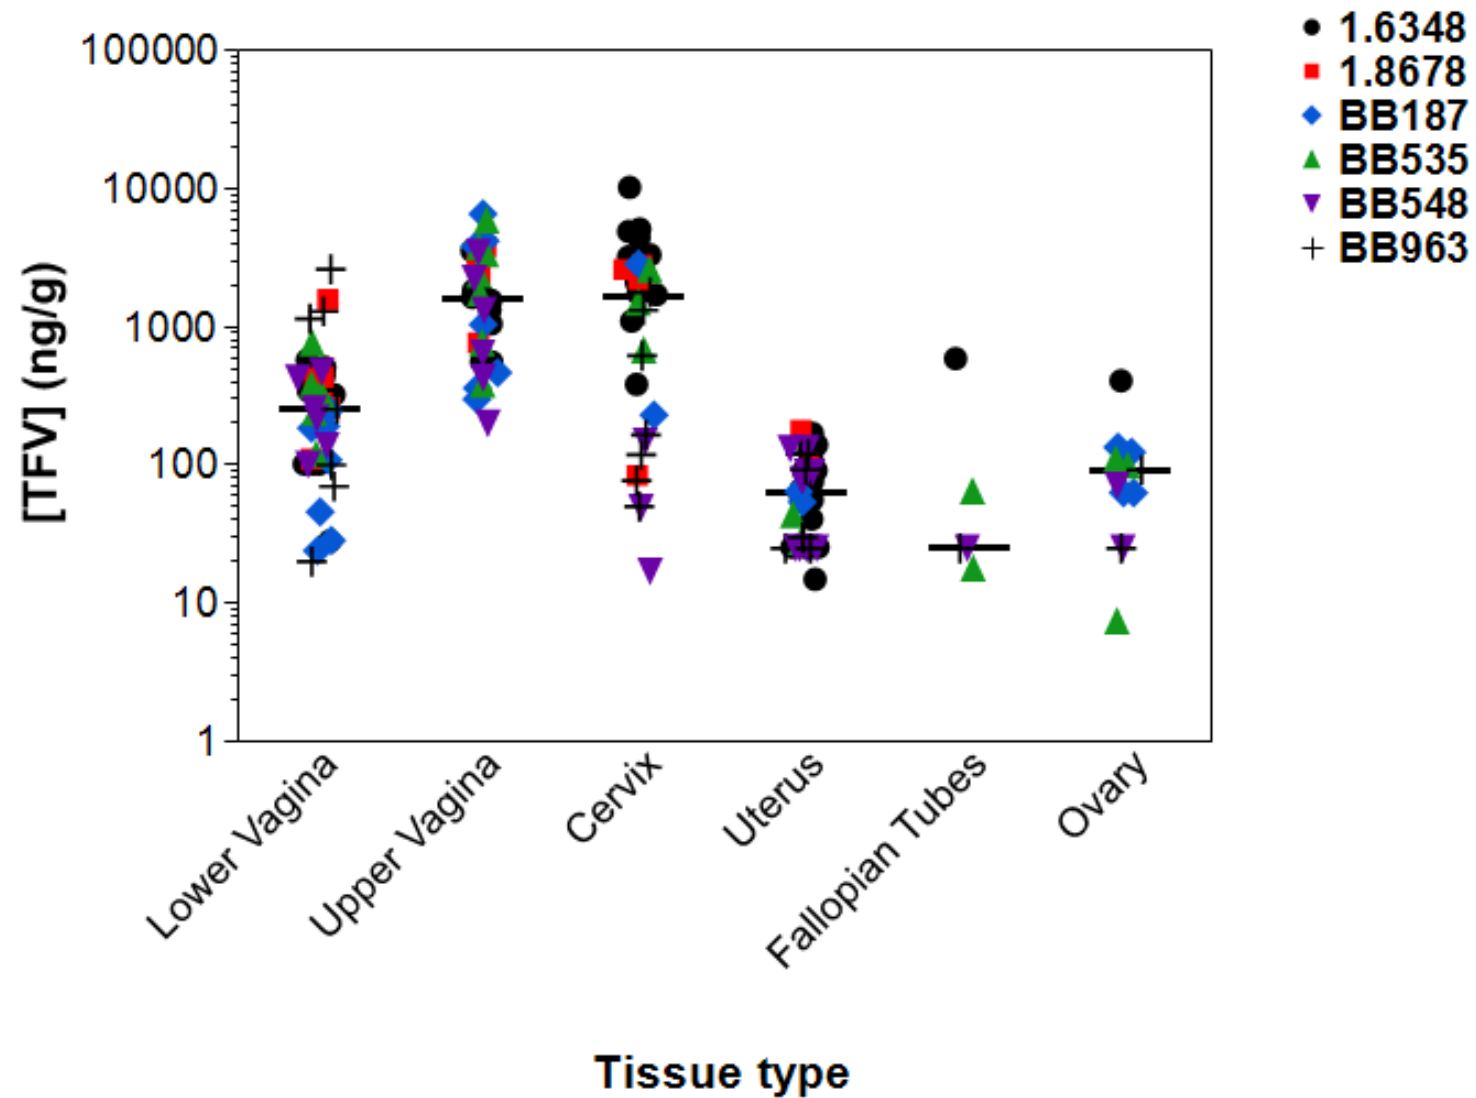



Figure 6A

Positive mCherry PCR products detected on ethidium bromide stained agarose gel

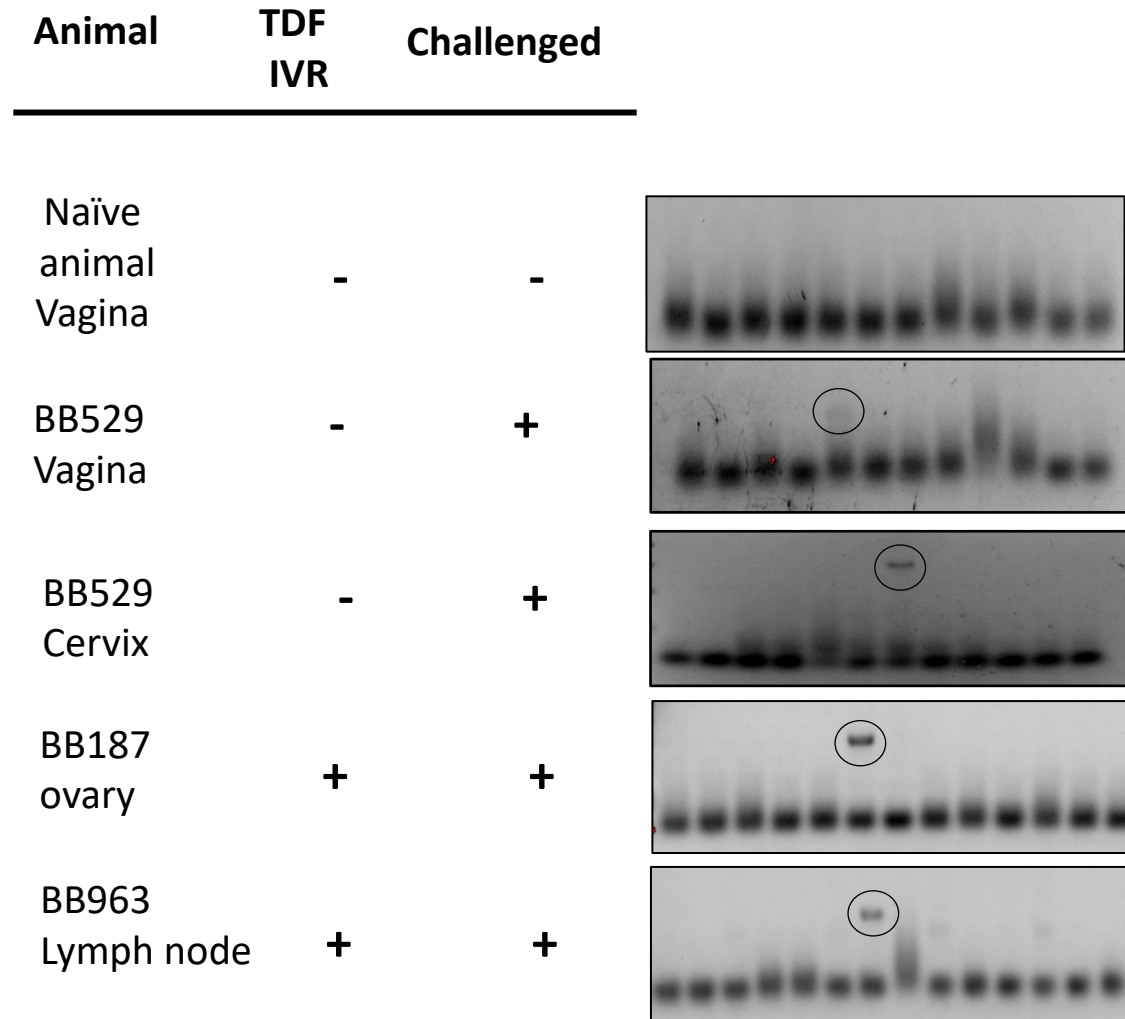

Figure 6B

Summary of proviral DNA detection throughout the entire FRT and lymph nodes using nested PCR.

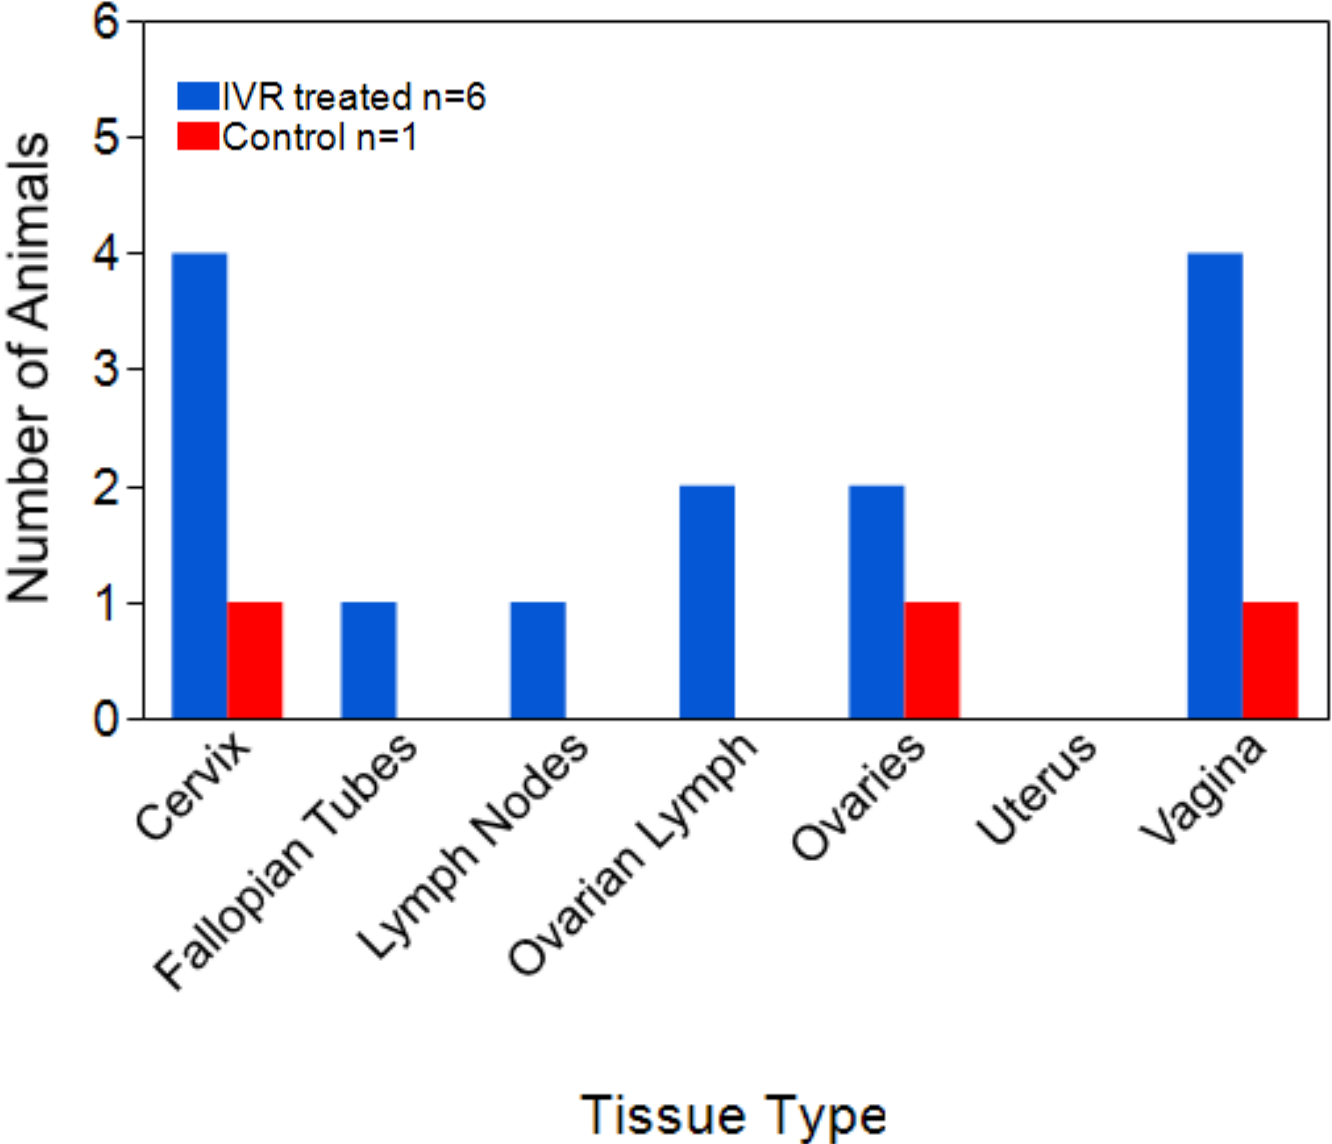

Table 3 Number of proviral DNA detected throughout the entire FRT and lymph nodes using nested PCR

| Animal code:        | <b>BB529</b> | <b>BB535</b> | <b>BB548</b> | <b>BB187</b> | <b>1.8678</b> | <b>1.6348</b> | <b>BB963</b> |
|---------------------|--------------|--------------|--------------|--------------|---------------|---------------|--------------|
| TDF IVR             | -            | +            | +            | +            | +             | +             | +            |
| <b>Uterus</b>       | <b>0/1</b>   | <b>0/3</b>   | <b>0/2</b>   | <b>0/3</b>   | <b>0/5</b>    | <b>0/4</b>    | <b>0/7</b>   |
| Ovary 1             | <b>1/1</b>   | <b>0/1</b>   | <b>0/1</b>   | <b>1/3</b>   | <b>0/1</b>    | <b>0/1</b>    | <b>0/1</b>   |
| Ovary 2             | -            | <b>0/1</b>   | <b>0/1</b>   | <b>0/2</b>   | <b>1/1</b>    | -             | -            |
| Ovarian Lymphatic 1 | -            | <b>0/1</b>   | <b>1/1</b>   | -            | <b>0/1</b>    | -             | <b>0/1</b>   |
| Ovarian Lymphatic 2 | -            | <b>0/1</b>   | <b>0/1</b>   | -            | <b>1/1</b>    | -             | <b>0/1</b>   |
| Fallopian Tubes     | <b>0/1</b>   | -            | <b>1/2</b>   | -            | <b>0/1</b>    | <b>0/1</b>    | <b>0/1</b>   |
| Cervix              | <b>1/2</b>   | <b>0/18</b>  | <b>4/15</b>  | <b>1/7</b>   | <b>1/9</b>    | <b>0/6</b>    | <b>2/11</b>  |
| Vagina              | <b>1/15</b>  | <b>0/32</b>  | <b>5/39</b>  | <b>3/30</b>  | <b>2/28</b>   | <b>4/8</b>    | <b>0/13</b>  |
| Lymph Nodes         | -            | <b>0/8</b>   | <b>0/4</b>   | <b>0/2</b>   | <b>0/5</b>    | <b>0/1</b>    | <b>1/3</b>   |

#/# : Proviral DNA detected/Total pieces of tissue screened

-: Tissue not available for screening

Figure 7

TFV concentration, PCR and luminescence maps from results in IVR treated animals in preclinical study.

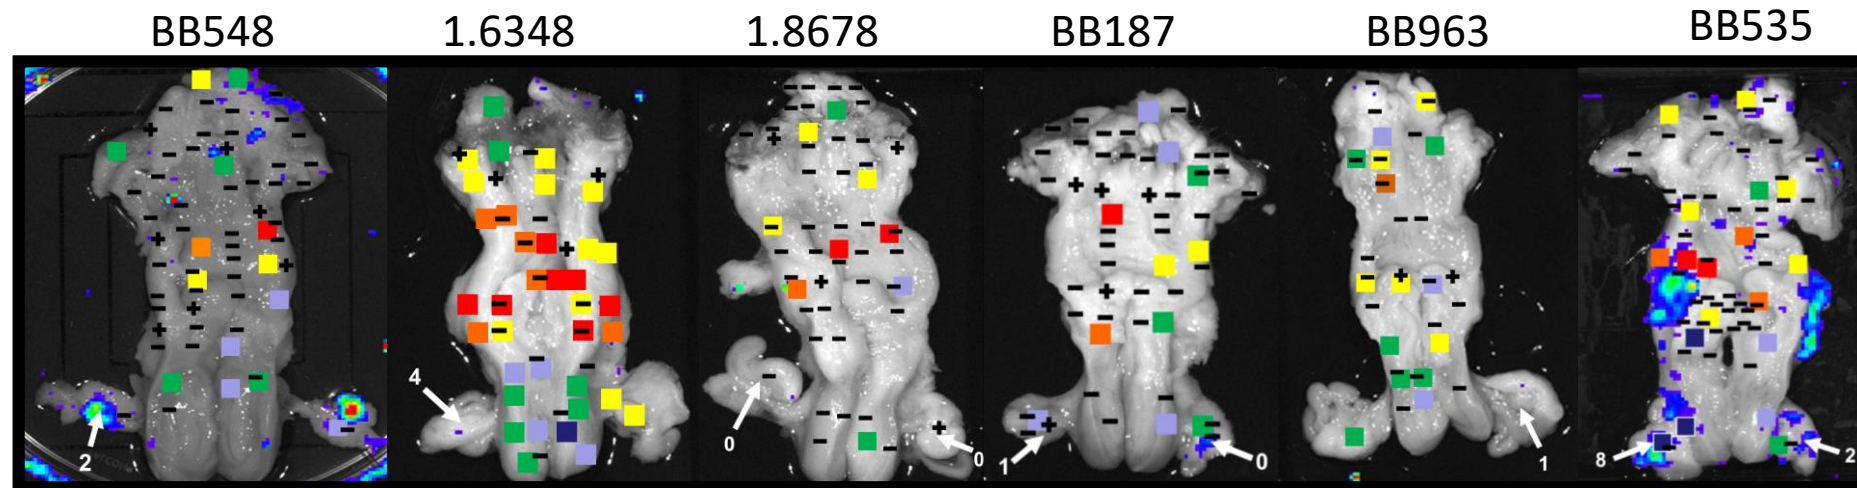

Tenofovir (ng/g tissue)

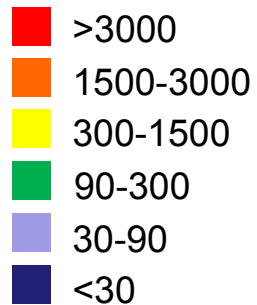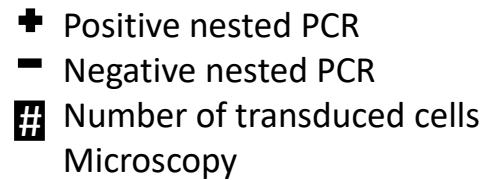

Fig. S1

## Scheme of LICh dual reporter genome and primer design for nested PCR

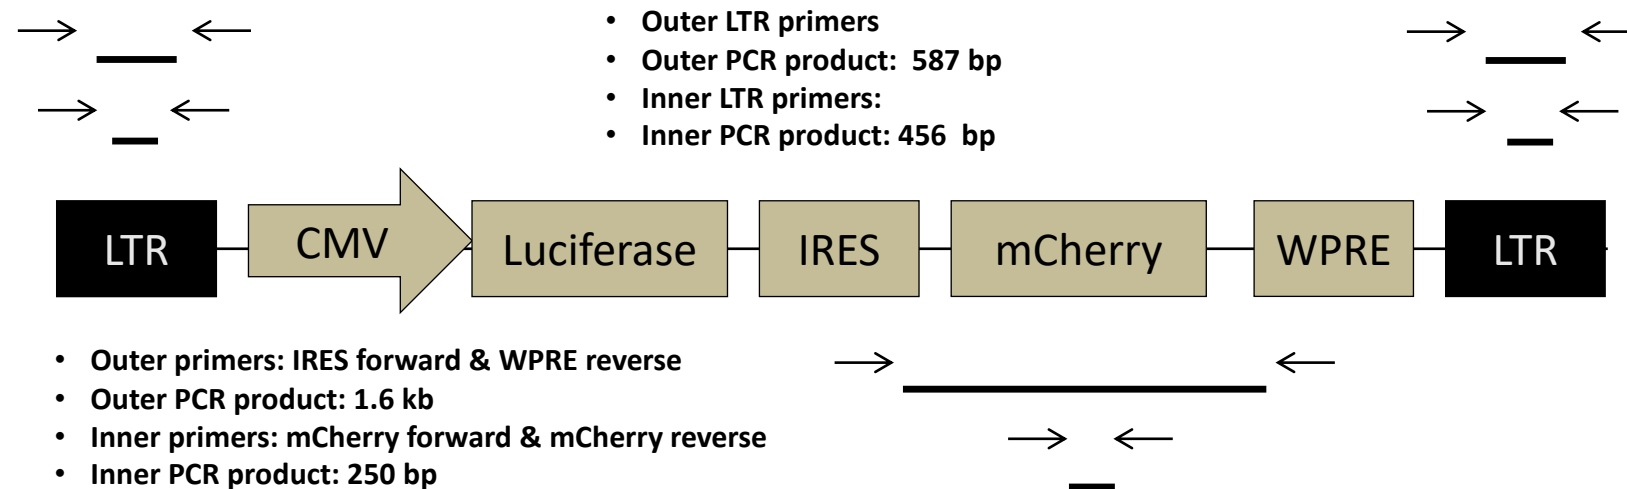

Fig. S2

## Primer efficiency assay

Single primer set nested PCR:

LTR outer PCR product: 587 bp

**LTR inner PCR product: 456 bp**

IRES-WPRE outer PCR product: 1.6 kb

**mCherry inner PCR product: 250 bp**

250 ng total DNA/reaction

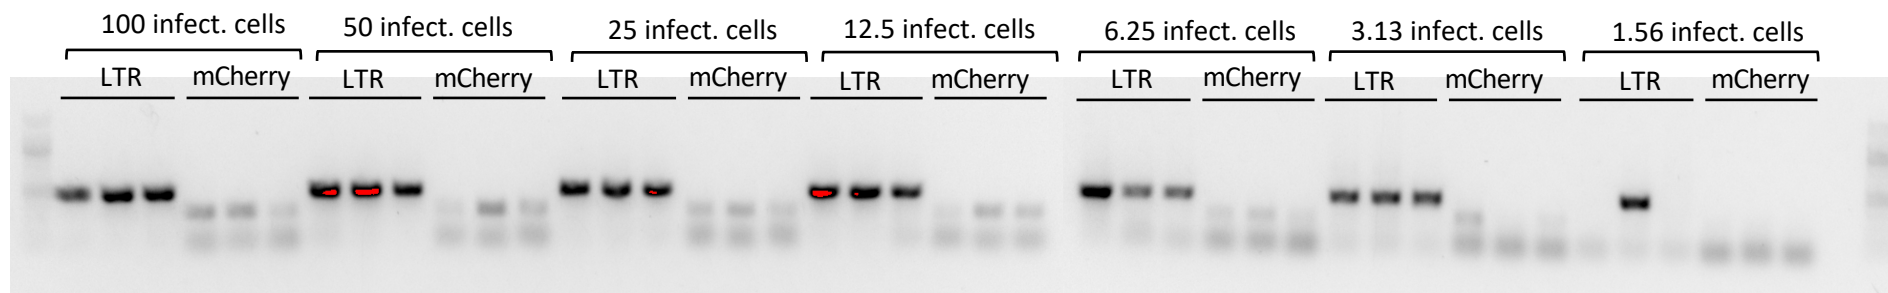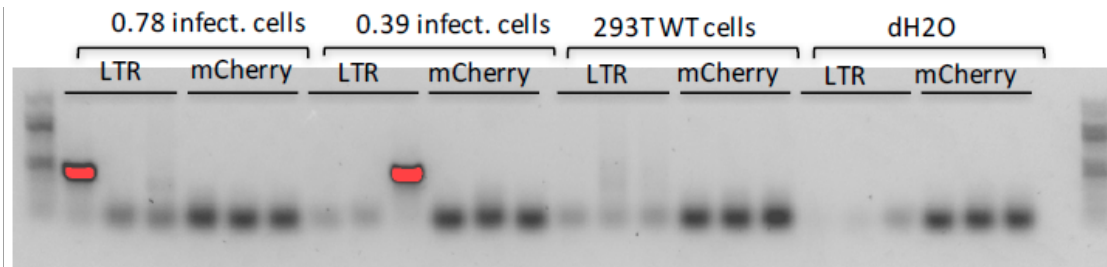

Fig. S3A

Spectral imaging, animal BB535, an ovary  
Spectral profiles of mCherry (610 nm) and AF647/Luciferase (665 nm)

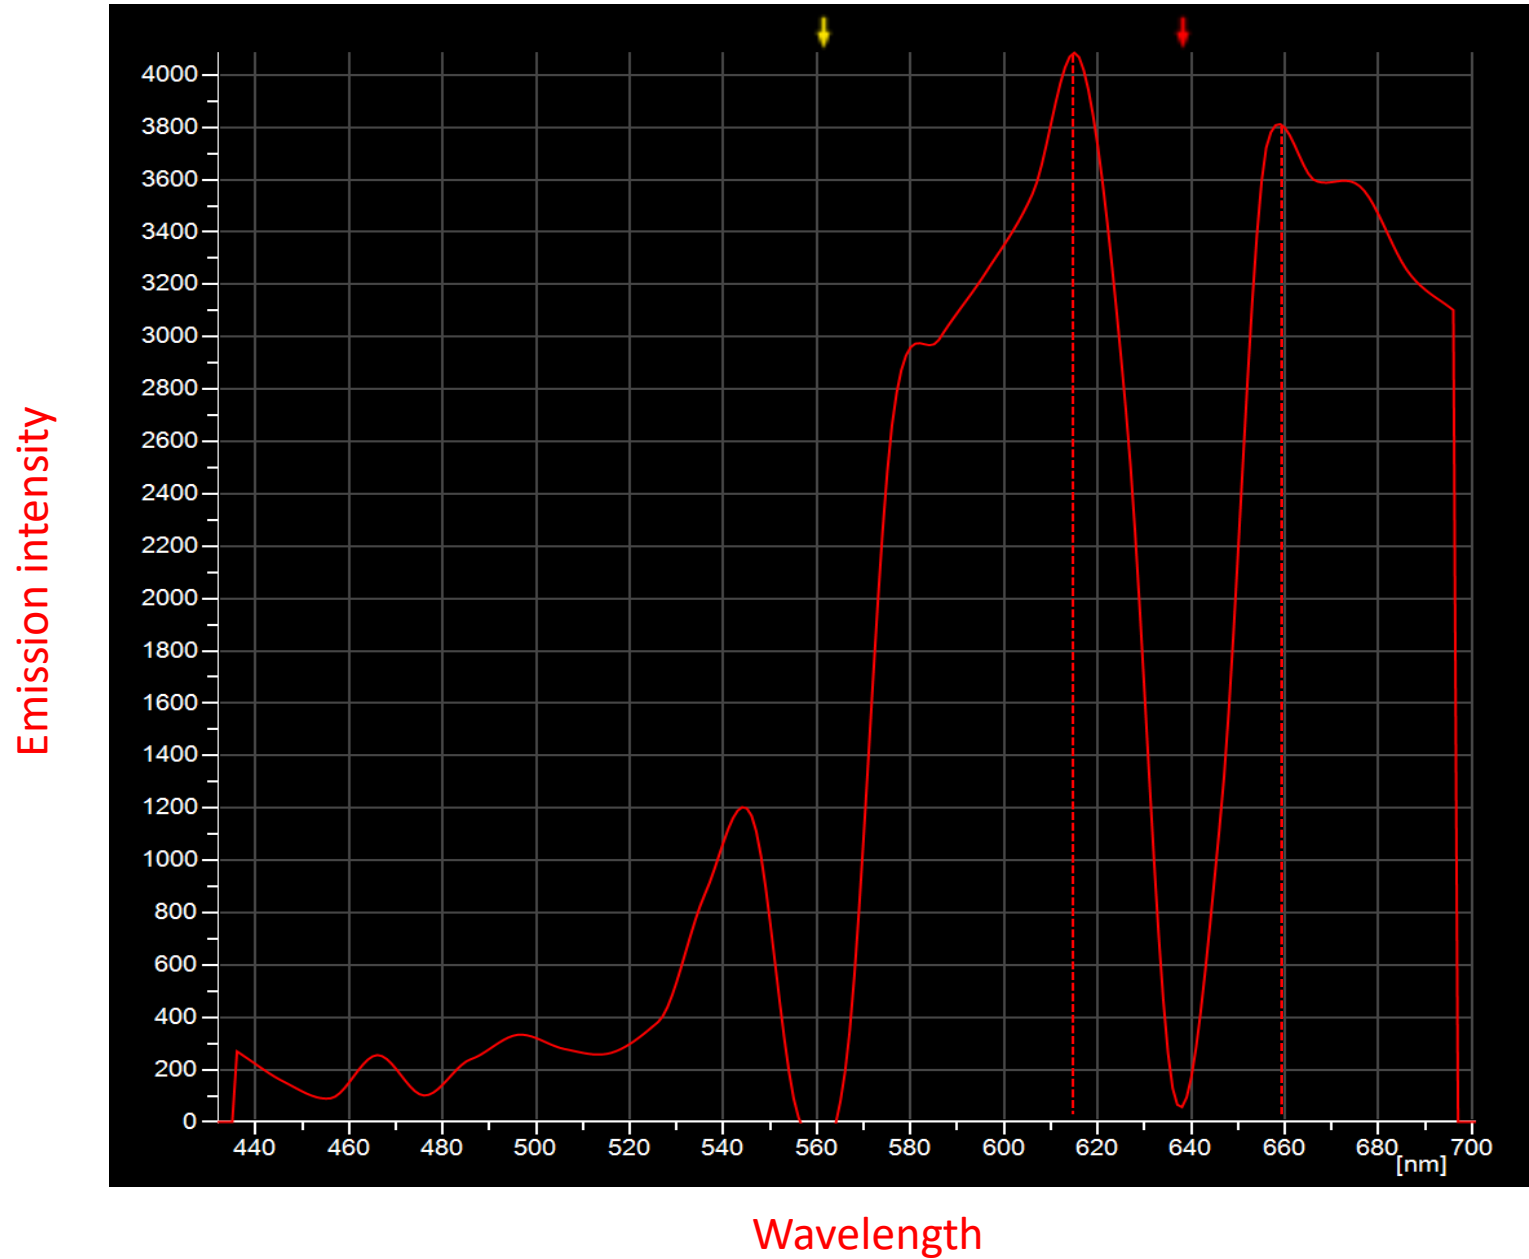

Fig. S3B

Spectral imaging, animal BB548, an ovary  
Spectral profiles of mCherry (610 nm) and AF647/Luciferase (665 nm)

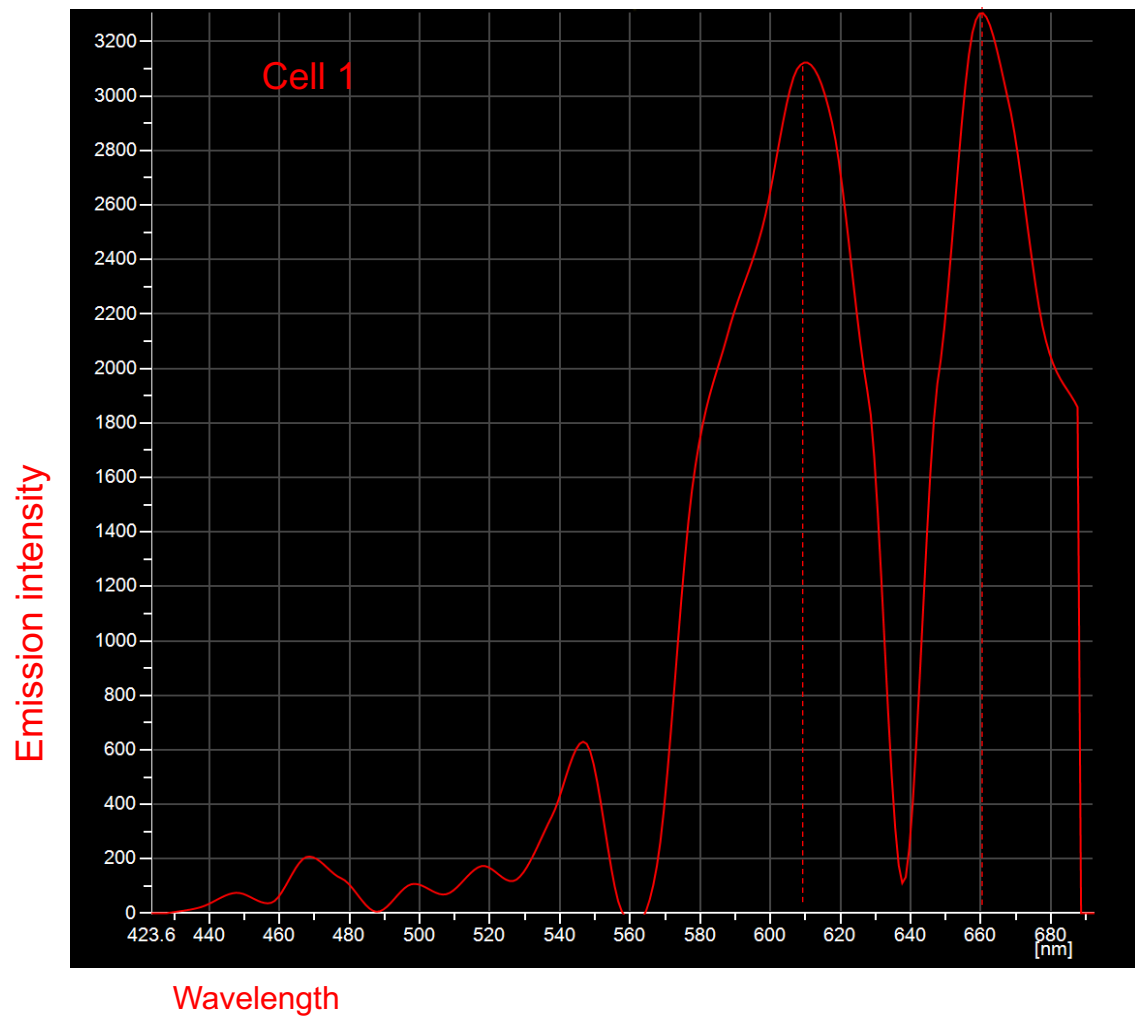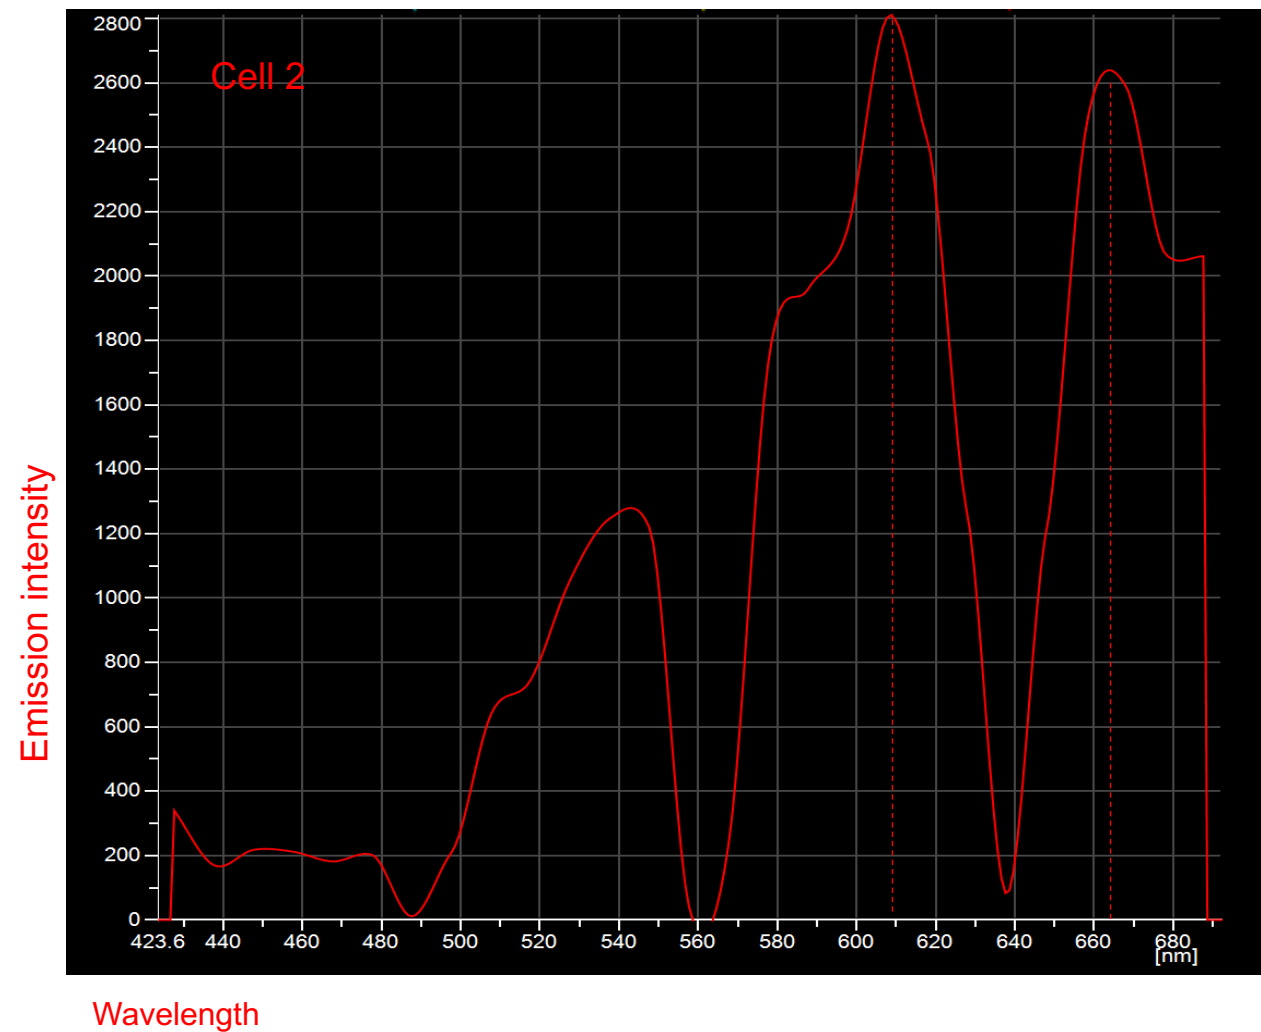

Source: https://www.biorxiv.org/content/biorxiv/early/2021/06/30/2021.06.29.450465.full.pdf
